1 **Structural basis for PRC2 decoding of active histone methylation marks H3K36me2/3**

2

3 Ksenia Finogenova(1), Jacques Bonnet (1), Simon Poepsel(2,3), Ingmar B. Schäfer(4), Katja

4 Finkl(1), Katharina Schmid(1), Claudia Litz(1), Mike Strauss(5,6), Christian Benda(4) and Jürg

5 Müller(1)

6

7 1) Max Planck Institute of Biochemistry, Laboratory of Chromatin Biology, Martinsried,  
8 Germany

9 2) California Institute for Quantitative Biology (QB3), University of California, Berkeley,  
10 Molecular Biophysics and Integrative Bio-Imaging Division, Lawrence Berkeley  
11 National Laboratory, Berkeley, CA

12 3) University of Cologne, Center for Molecular Medicine Cologne (CMMC), Faculty of  
13 Medicine and University Hospital Cologne, Cologne, Germany, Cologne Excellence  
14 Cluster for Cellular Stress Responses in Ageing-Associated Diseases (CECAD),  
15 University of Cologne, Cologne, Germany

16 4) Max Planck Institute of Biochemistry, Department of Structural Cell Biology,  
17 Martinsried, Germany

18 5) Max Planck Institute of Biochemistry, cryoEM Facility, Martinsried, Germany

19 6) Current address: McGill University, Department of Anatomy and Cell Biology,  
20 Montreal, Canada

21

22 Correspondence should be addressed to J.M. ([muellerj@biochem.mpg.de](mailto:muellerj@biochem.mpg.de))

23

24 **ABSTRACT**

25 **Repression of genes by Polycomb requires that PRC2 modifies their chromatin by**  
26 **trimethylating lysine 27 on histone H3 (H3K27me3). At transcriptionally active genes, di-**  
27 **and trimethylated H3K36 inhibit PRC2. Here, the cryo-EM structure of PRC2 on**  
28 **dinucleosomes reveals how binding of its catalytic subunit EZH2 to nucleosomal DNA**  
29 **orients the H3 N-terminus via an extended network of interactions to place H3K27 into**  
30 **the active site. Unmodified H3K36 occupies a critical position in the EZH2-DNA**  
31 **interface. Mutation of H3K36 to arginine or alanine inhibits H3K27 methylation by**  
32 **PRC2 on nucleosomes *in vitro*. Accordingly, *Drosophila* H3K36A and H3K36R mutants**  
33 **show reduced levels of H3K27me3 and defective Polycomb repression of HOX genes. The**  
34 **relay of interactions between EZH2, the nucleosomal DNA and the H3 N-terminus**  
35 **therefore creates the geometry that permits allosteric inhibition of PRC2 by methylated**  
36 **H3K36 in transcriptionally active chromatin.**

37

38

39 **INTRODUCTION**

40 Many post-translational modifications on histone proteins are essential for processes in the  
41 underlying chromatin. Typically, histone modifications themselves do not alter chromatin  
42 structure directly but function by binding effector proteins which alter chromatin or by  
43 interfering with such interactions. The histone methyltransferase Polycomb Repressive  
44 Complex 2 (PRC2) and its regulation by accessory proteins and histone modifications represent  
45 a prime example for understanding these interaction mechanisms (Laugesen et al., 2019; Yu et  
46 al., 2019). PRC2 trimethylates lysine 27 in histone H3 (H3K27me3), a modification that is  
47 essential for the transcriptional repression of developmental regulator genes that control cell  
48 fate decisions in metazoans (McKay et al., 2015; Pengelly et al., 2013). H3K27me3 marks  
49 chromatin for interaction with PRC1, an effector which compacts chromatin (Francis et al.,  
50 2004; Grau et al., 2011). H3K27me3 is also recognized by PRC2 itself, and this interaction  
51 allosterically activates the PRC2 enzyme complex to facilitate deposition of H3K27me3 across

52 extended domains of chromatin (Hansen et al., 2008; Jiao and Liu, 2015; Margueron et al.,  
53 2009). Genetic studies and subsequent biochemical work established that PRC2 is in addition  
54 subject to negative regulation. In particular, the H3K4me3, H3K36me2 and H3K36me3 marks  
55 present on nucleosomes in transcriptionally active chromatin directly inhibit H3K27  
56 methylation by PRC2 (Gaydos et al., 2012; Klymenko and Müller, 2004; Schmitges et al., 2011;  
57 Streubel et al., 2018; Yuan et al., 2011). Importantly, while stimulation of PRC2 activity by  
58 H3K27me3 acts *in trans*, inhibition of PRC2 by H3K4me3, H3K36me2 and H3K36me3  
59 requires that these modifications are present *in cis*, that is, on the same H3 molecule containing  
60 the K27 substrate lysine (Schmitges et al., 2011; Yuan et al., 2011). While recent structural  
61 studies have uncovered the allosteric activation mechanism for PRC2 (Jiao and Liu, 2015;  
62 Justin et al., 2016), the molecular basis of PRC2 inhibition by active chromatin marks has  
63 remained enigmatic. In particular, in nucleosome binding assays, PRC2-DNA interactions  
64 make the largest contribution to the nucleosome-binding affinity of PRC2 (Choi et al., 2017;  
65 Wang et al., 2017) and H3K4me3, H3K36me2 and H3K36me3 do not seem to have a major  
66 effect on this binding affinity (Guidotti et al., 2019; Jani et al., 2019; Schmitges et al., 2011).  
67 Instead, these three modification were found to reduce the  $k_{cat}$  of PRC2 for H3K27 methylation  
68 (Jani et al., 2019; Schmitges et al., 2011). Recent cross-linking studies led to the suggestion of  
69 a possible sensing pocket for H3K36 on the surface of EZH2 (Jani et al., 2019) but there is no  
70 structural data how that proposed interaction might occur. Similarly, a recent structure of PRC2  
71 bound to a dinucleosome revealed how the catalytic lobe of PRC2 contacts nucleosomes  
72 through DNA interactions but provided no structural insight into how the H3 N-termini might  
73 be recognized (Poepsel et al., 2018). Here, a refined structure of PRC2 bound to a  
74 dinucleosome allowed us to visualize how the histone H3 N-terminus on substrate nucleosomes  
75 is threaded into the EZH2 active site. Our analyses reveal that H3K36 assumes a critical  
76 position in the PRC2-nucleosome interaction interface that permits the complex to gauge the  
77 H3K36 methylation state.

78

79

80 **RESULTS**

81 **EZH2 interaction with nucleosomal DNA orients the H3 N-terminus for H3K27 binding**  
82 **to the active site**

83 We assembled recombinant full-length human PRC2 in complex with its accessory factor PHF1  
84 (i.e. PHF1-PRC2) (Choi et al., 2017) on a heterodimeric dinucleosome (di-Nuc), which  
85 consisted of a ‘substrate’ nucleosome with unmodified histone H3 and an ‘allosteric’  
86 nucleosome containing H3 with a trimethyllysine analog (Simon et al., 2007) at K27, separated  
87 by a 35 base pair (bp) DNA linker (Poepsel et al., 2018) (**Figure 1A, B**). Single particle cryo-  
88 electron microscopy analysis yielded a reconstruction of the PHF1-PRC2:di-Nuc assembly  
89 with an overall resolution of 5.2 Å (**Supplementary Figures 1-3**). The map showed clear  
90 density for the catalytic lobe of PRC2 with similar chromatin interactions and binding geometry  
91 as previously described for the catalytic lobe of AEBP2-PRC2 (Poepsel et al., 2018) where  
92 PRC2 contacts the two nucleosomes via interactions with the DNA gyres (**Figure 1C**).  
93 Specifically, the substrate nucleosome is bound by the EZH2<sub>CXC</sub> domain residues K563, Q565,  
94 K569 and Q570 (**Figure 1D, Supplementary Figure 4A**, cf. (Poepsel et al., 2018)), while the  
95 allosteric nucleosome is contacted by EED and by the SBD and SANT1 domains of EZH2  
96 (**Figure 1E**, cf. (Poepsel et al., 2018)). We could not detect density for the ‘bottom lobe’ of  
97 PRC2 (Chen et al., 2018; Kasinath et al., 2018) or for the N-terminal winged-helix and tudor  
98 domains of PHF1 that bind DNA and H3K36me<sub>3</sub>, respectively (Ballaré et al., 2012; Cai et al.,  
99 2013; Choi et al., 2017; Li et al., 2017; Musselman et al., 2013).

100 Using particle signal subtraction and focused refinement on the interface of EZH2 and  
101 the substrate nucleosome (**Supplementary Figures 2-3**), we then obtained an improved map  
102 at an apparent overall resolution of 4.4 Å which revealed well-defined density for the H3 N-  
103 terminus (**Figure 1F, Supplementary Figure 3B-D**). The visible sidechain density combined  
104 with the crystallographic models of the PRC2 catalytic lobe and of the mononucleosome  
105 enabled us to build a pseudo-atomic model of the histone H3 N-terminus spanning residues  
106 R26 to K37 (**Figure 1F**). This model revealed that EZH2 recognizes the H3 N-terminus via an  
107 extended network of contacts besides the previously described ionic interactions near the active

108 site where H3 R26 interacts with EZH2 Q648/D652, and H3 K27 with the aromatic cage above  
109 the EZH2 catalytic center (Justin et al., 2016) (**Figure 1F**). Specifically, our structure suggests  
110 two hydrophobic hotspots, the first one involving H3 A29/P30 and EZH2 residues F667, A697,  
111 V699, I708 and F724 and the second one involving H3 V35 and F542, F557 and P558 of EZH2  
112 (**Figure 1F**). H3 G33/G34 is likely not recognized by PRC2 but might act as a flexible hinge  
113 between the two hydrophobic interaction sites (**Figure 1F**). H3K36 is directly juxtaposed to the  
114 EZH2<sub>CXC</sub>-DNA interaction surface and appears to be involved in the EZH2-DNA interface. The  
115 side chain density of H3K36 suggests that the epsilon-amino group of H3K36 engages in a  
116 polar interaction with the carbonyl group of Q570 and in long-range electrostatic interactions  
117 with the phosphate backbone of the nucleosomal DNA (**Figure 1F, Supplementary Figure 4**  
118 **C-E**). Taken together, our analyses reveal that an extensive network of interactions between  
119 EZH2, the nucleosomal DNA and the H3 N-terminus. This complex geometric arrangement  
120 orients the H3 N-terminus into an extended conformation, threading H3K27 into the EZH2  
121 active site. In this context, it should be noted that a previously postulated H3K36-binding  
122 pocket centered on E579 of EZH2 (Jani et al., 2019) is located approximately 19 Å away from  
123 H3K36 in our structure (**Supplementary Figure 4F**). An interaction of H3K36 with E579 of  
124 EZH2 as proposed by Muir and co-workers (Jani et al., 2019) would require a very different  
125 binding geometry of PRC2 on the nucleosome and major structural rearrangements of PRC2 or  
126 the nucleosome in order to avoid steric clashes.

127

### 128 **The EZH2 CXC contact with DNA is essential for H3K27 methylation**

129 We next analysed how the PRC2 surfaces contacting the substrate and the allosteric nucleosome  
130 contribute to the formation of productive PRC2-chromatin interactions. For these experiments,  
131 we used PHF1<sub>C</sub>-PRC2, which contains the minimal 5-kDa PRC2-interaction domain of PHF1  
132 (**Figure 1A**, (Chen et al., 2020; Choi et al., 2017)) but lacks the H3K36me<sub>3</sub>-binding tudor and  
133 the DNA-binding winged-helix domains of PHF1 (Choi et al., 2017; Li et al., 2017; Musselman  
134 et al., 2013). PHF1<sub>C</sub>-PRC2 therefore only retains the DNA-binding surfaces of the 4-subunit  
135 PRC2 core complex and was used because it generally behaved better in purifications than the

136 4-subunit PRC2 core complex. For simplicity we shall, in the following, refer to the PHF1C-  
137 PRC2 complex as PRC2. We generated three mutant versions of PRC2. In PRC2<sup>CXC>A</sup> (K563A  
138 Q565A K569A Q570A), the EZH2<sub>CXC</sub> interface is mutated (**Figure 1D**), in PRC2<sup>EED>A</sup> (K77A  
139 K83A K385A K398A K400A K408A), the EED interface contacting the allosteric nucleosome  
140 (**Figure 1E**), is mutated, and PRC2<sup>CXC>A/EED>A</sup> carries the combination of these mutations. We  
141 first used electromobility shift assays (EMSA) to measure the binding affinity of wild-type and  
142 mutant PRC2 complexes on mononucleosomes. These mononucleosomes were assembled on  
143 a 215 bp long DNA fragment containing the 147-bp 601 nucleosome-positioning sequence  
144 (Lowary and Widom, 1998) in the center and linker DNA on both sides. Wild-type PRC2  
145 bound this mononucleosome with an apparent  $K_d$  in the mid-nanomolar range (**Figure 2A, B**,  
146 cf. (Choi et al., 2017)). The binding affinities of PRC2<sup>CXC>A</sup> or PRC2<sup>EED>A</sup> were two- to three-  
147 fold lower than that of wild-type PRC2 and that of PRC2<sup>CXC>A/EED>A</sup> was about five-fold lower  
148 compared to the wild-type complex (**Figure 2A, B**, compare lanes 11-30 with 1-10, and  
149 **Supplementary Figure 5A**). The residual nucleosome binding shown by PRC2<sup>CXC>A/EED>A</sup>  
150 (**Figure 2A**, lanes 21-30) could in part be due to incomplete disruption of the mutated interfaces  
151 but in part is likely also due to the previously identified nucleosome-binding activity of the  
152 PRC2 bottom lobe (Chen et al., 2018; Nekrasov et al., 2005). The overall binding affinity of  
153 the PRC2 core complex for chromatin therefore appears to result from interactions of at least  
154 three distinct surfaces of this complex with nucleosomes. Among those, binding of the  
155 EZH2<sub>CXC</sub> domain to the nucleosomal DNA contributes only modestly to the total binding  
156 affinity.

157 We then analysed the histone methyltransferase (HMTase) activity of PRC2<sup>CXC>A</sup>. On  
158 the same mononucleosomes used above, PRC2<sup>CXC>A</sup> showed almost no detectable HMTase  
159 activity compared to wild-type PRC2 (**Figure 2C**, compare lanes 5-7 with 2-4, see also  
160 **Supplementary Figure 5B**). On dinucleosomes, EED binding to one nucleosome might be  
161 expected to facilitate interaction of the mutated EZH2<sup>CXC>A</sup> domain with the H3 N-termini on  
162 the juxtaposed second nucleosome. Indeed, on dinucleosomes, the PRC2<sup>CXC>A</sup> complex does  
163 generate H3K27me1 and -me3 but less efficiently than wild-type PRC2 (**Figure 2C**, compare

164 lanes 12-14 with 9-11). When comparing the activities of the different complexes, it should be  
165 kept in mind that the interpretation of H3K27me3 formation as read-out of complex activity on  
166 dinucleosomes is more complicated than on mononucleosomes, because H3K27me3, once  
167 placed on one of the nucleosomes, will allosterically activate PRC2 to methylate H3K27 on the  
168 linked second nucleosome (Margueron et al., 2009) (Jiao and Liu, 2015). The main conclusion  
169 to be drawn from our analyses here is that the DNA-binding interaction of the EZH2<sub>CXC</sub> domain  
170 with substrate nucleosomes is critical for engaging the H3 N-terminus in a manner that allows  
171 H3K27 methylation.

172

173 **Unmodified H3K36 in the EZH2<sub>CXC</sub>-DNA interaction interface is critical for H3K27**  
174 **methylation in nucleosomes**

175 The architecture of the EZH2<sub>CXC</sub>-DNA interface around H3K36 (**Figure 1F**) suggested that a  
176 bulkier side chain, such as that of a tri- or di-methylated lysine or an arginine may not be  
177 accommodated in this interface. In EMSAs, the affinity of PRC2 for binding to  
178 mononucleosomes containing a trimethyllysine analog at H3K36 (H3Kc36me3) was  
179 indistinguishable from that for binding to unmodified mononucleosomes (**Figure 3A, B**).  
180 However, as previously reported (Schmitges et al., 2011; Yuan et al., 2011), H3K27 mono- and  
181 trimethylation by PRC2 was strongly inhibited on H3Kc36me3-containing mononucleosomes  
182 (**Figure 3C**, compare lanes 5-7 with 2-4, see also **Supplementary Figure 6A**). Methylation of  
183 H3K27 was also inhibited on mononucleosomes where H3K36 had been mutated to arginine  
184 or alanine (H3<sup>K36R</sup> and H3<sup>K36A</sup> mononucleosomes, respectively) (**Figure 3C**, compare lanes 8-  
185 13 with 2-4). PRC2 inhibition on H3<sup>K36R</sup> and H3<sup>K36A</sup> mononucleosomes was, however, less  
186 severe than on H3Kc36me3 mononucleosomes (**Figure 3C**, compare lanes 8-13 with 5-7). We  
187 note that the quantitative analyses here show inhibition of PRC2 HMTase activity on H3<sup>K36A</sup>  
188 mononucleosomes, consistent with earlier studies (Jani et al., 2019), whereas other studies  
189 previously had failed to detect inhibition on H3<sup>K36A</sup> mononucleosomes (Schmitges et al., 2011).  
190 Taken together, our structural and biochemical analyses suggest that the unmodified side chain  
191 of H3K36 is critical for the productive positioning of H3K27 in the catalytic center of PRC2.

192 Neither the bulkier side chains of trimethyllysine or arginine nor the short apolar side chain of  
193 alanine appear to provide the correct fit at the position of H3K36. Finally, we compared PRC2  
194 HMTase activity on histone H3<sub>18-42</sub> peptides that were either unmodified or contained  
195 H3K36me3 using a Massspectrometry-based methylation assay. Importantly, on this isolated  
196 peptide, H3K36me3 did not inhibit H3K27 monomethylation by PRC2 (**Figure 3D**,  
197 **Supplementary Figure 6B**). The allosteric inhibition of PRC2 by H3K36me3 therefore only  
198 occurs in the context of the geometric constraints of the nucleosome.

199

### 200 **H3K36me3 inhibits H3K27 methylation by PHF1-PRC2**

201 DNA-binding by the winged-helix domain of PHF1 increases the binding affinity and residence  
202 time of PHF1-PRC2 on nucleosomes about two- to three-fold, resulting in more efficient  
203 H3K27 methylation by this complex compared to PRC2 (Choi et al., 2017). Furthermore, the  
204 PHF1 tudor domain binds to H3K36me3 in the context of a nucleosome (Musselman et al.,  
205 2013). To investigate whether these interactions might modulate PRC2 inhibition by  
206 H3K36me3, we compared the HMTase activity of full-length PHF1-PRC2 (**Figure 1B**) on  
207 unmodified and H3Kc36me3 mononucleosomes. H3K27 mono- and tri-methylation by PHF1-  
208 PRC2 was strongly inhibited on H3Kc36me3 mononucleosomes (**Supplementary Figure 6C**).  
209 H3K36me3 therefore inhibits H3K27 methylation by PHF1-PRC2 even though this complex  
210 has higher binding-affinity and a prolonged residence time on nucleosomes (Choi et al., 2017).  
211 Further analyses will be needed to assess whether and how interaction of the PHF1 tudor  
212 domain with H3K36me3 might change H3K27 methylation by PHF1-PRC2 on more complex  
213 oligonucleosome substrates containing H3K36me3- and unmodified nucleosomes.

214

### 215 ***Drosophila* with H3<sup>K36R</sup> or H3<sup>K36A</sup> mutant chromatin arrest development at different** 216 **stages**

217 The observation that PRC2 is not only inhibited on H3K36me2/3-modified nucleosomes but  
218 also on H3<sup>K36R</sup> and on H3<sup>K36A</sup> mutant nucleosomes prompted us to investigate how H3K27  
219 trimethylation is affected in *Drosophila* with H3<sup>K36R</sup> or H3<sup>K36A</sup> mutant chromatin. H3K27me3



220 is primarily found on canonical histone H3 (McKay et al., 2015; Pengelly et al., 2013). We  
221 used the following strategy to replace the canonical histone H3 gene copies encoded in the *HisC*  
222 gene cluster with  $H3^{K36R}$  or  $H3^{K36A}$  mutant versions. Animals that are homozygous for a  
223 deletion of the *HisC* gene cluster (i.e. *Df(2L)HisC* homozygotes) arrest development at the  
224 blastoderm stage after exhaustion of the pool of maternally-deposited histones but transgene  
225 cassettes providing 12 copies of the wild-type histone gene unit (*12xHisGU<sup>WT</sup>*) rescue  
226 *Df(2L)HisC* homozygotes into viable adults (Günesdogan et al., 2010; McKay et al., 2015).  
227 We therefore generated *Df(2L)HisC* homozygotes carrying *12xHisGU<sup>H3K36R</sup>* or *12xHisGU<sup>H3K36A</sup>*  
228 transgene cassettes and shall refer to these animals as  $H3^{K36R}$  and  $H3^{K36A}$  mutants, respectively.  
229 The *Drosophila* strains to generate  $H3^{K36R}$  mutant animals had been described previously  
230 (McKay et al., 2015). The strain for generating  $H3^{K36A}$  mutants was constructed in this study.  
231  $H3^{K36R}$  mutant animals complete embryogenesis and their cuticle morphology is  
232 indistinguishable from wildtype (**Supplementary Figure 7**). In agreement with the results  
233 from Matera and colleagues (McKay et al., 2015), we found that these animals arrest  
234 development during the larval or pupal stages. Specifically, 81% of  $H3^{K36R}$  mutant animals  
235 arrested development at variable time points during larval growth, 18% develop to form pupae  
236 that die prior to metamorphosis, and 1% develop into late pupae that complete metamorphosis  
237 but then arrest as pharate adults (**Supplementary Figure 7**). Like Matera and colleagues  
238 (McKay et al., 2015), we have not observed any  $H3^{K36R}$  mutants that eclose from the pupal case,  
239 and both our studies therefore disagree with a report from the Schwartz lab who claimed that  
240  $H3^{K36R}$  mutants would be able to develop into adults (Dorafshan et al., 2019). When we  
241 dissected the rare  $H3^{K36R}$  mutant pharate adults from their pupal cases and examined their  
242 epidermal structures, we found that they consistently showed homeotic transformations  
243 reminiscent of Polycomb group (PcG) mutants. These PcG mutant phenotypes included  
244 antenna-to-leg transformations and extra sex comb teeth on meso- and metathoracic legs in  
245 males (**Supplementary Figure 7**). A molecular analysis of these PcG phenotypes will be  
246 presented below.

247  $H3^{K36A}$  mutants also complete embryogenesis and the morphology of their embryonic  
248 cuticle also appeared indistinguishable from wildtype (**Supplementary Figure 7**). 96% of the  
249  $H3^{K36A}$  mutant animals arrest development before hatching from the eggshell and the 4% that  
250 hatch die during the first larval instar (**Supplementary Figure 7**).  $H3^{K36A}$  mutants therefore  
251 arrest development earlier and in a narrower time window than  $H3^{K36R}$  mutants. The molecular  
252 basis for the earlier lethality of  $H3^{K36R}$  mutant animals remains to be determined. However, it  
253 is not unusual that mutations changing the chemical properties of a particular histone lysine  
254 residue result in phenotypes with different severity (e.g. (Copur et al., 2018))

255

256 ***Drosophila* with  $H3^{K36R}$  or  $H3^{K36A}$  mutant chromatin show diminished H3K27me3 levels**  
257 **at canonical PcG target genes**

258 We next performed Western blot analyses to examine H3K36me2, H3K36me3 and H3K27me3  
259 bulk levels in  $H3^{K36R}$  and  $H3^{K36A}$  mutant animals. In the case of  $H3^{K36R}$  mutants, we used  
260 extracts from diploid imaginal disc and central nervous system (CNS) tissues dissected from  
261 third instar larvae, and in the case of  $H3^{K36A}$  mutants we used total nuclear extracts from late-  
262 stage embryos. For the interpretation of the following experiments, it is important to keep in  
263 mind that  $H3^{K36R}$  and  $H3^{K36A}$  zygotic mutant animals initially also contain a pool of maternally-  
264 deposited wild-type canonical H3 molecules that, together with  $H3^{K36R}$  and  $H3^{K36A}$ , become  
265 incorporated into chromatin during the pre-blastoderm cleavage cycles. Even though these  
266 wild-type H3 molecules then become diluted during every cell cycle and are eventually fully  
267 replaced by mutant H3, they are probably still present in the chromatin of late-stage embryos  
268 because of the few cell divisions that take place prior to the end of embryogenesis. In diploid  
269 tissues from larvae, replacement by mutant H3 is expected to be much more complete because  
270 of the extensive cell proliferation that occurs in these tissues during larval growth.

271 In  $H3^{K36R}$  mutant larvae, H3K36me2 and H3K36me3 bulk levels were reduced more  
272 than 4-fold compared to wildtype (**Figure 4A**). The residual H3K36me2 and H3K36me3  
273 signals (**Figure 4A**, lane 4) probably represent the methylated versions of the histone variant  
274 H3.3 that are encoded by the genes *H3.3A* and *H3.3B* that are not located in the *HisC* locus and

275 had not been mutated in these animals. Intriguingly,  $H3^{K36R}$  mutant animals also showed an  
276 about two-fold reduction in H3K27me3 bulk levels compared to wildtype (**Figure 4A**, compare  
277 lanes 4-6 with 1-3). The reduction of not only H3K36me2 and H3K36me3 but also of  
278 H3K27me3 bulk levels in  $H3^{K36R}$  mutant larvae was previously also noted by Matera and  
279 colleagues (Meers et al., 2017). H3K27 tri-methylation by PRC2 therefore appears to be  
280 compromised in *Drosophila* chromatin consisting of  $H3^{K36R}$  nucleosomes.

281 In  $H3^{K36A}$  mutant embryos, H3K36me2 and H3K36me3 bulk levels were reduced about  
282 3- to 4-fold compared to wildtype (**Figure 4B**, compare lanes 5-8 with 1-4). Part of the residual  
283 H3K36me2 and H3K36me3 methylation signals in  $H3^{K36A}$  mutant embryos probably represents  
284 the methylated versions of the histone variant H3.3. However, considering that the reduction  
285 is less pronounced than in  $H3^{K36R}$  mutant larvae, at least some of the H3K36me2 and  
286 H3K36me3 signal might also represent maternally-deposited wild-type canonical H3.  
287 H3K27me3 bulk levels appeared largely unchanged compared to wildtype (**Figure 4B**,  
288 compare lanes 5-8 with 1-4).

289 We next performed ChIP-seq experiments to examine how the genome-wide profiles  
290 of H3K36me2 and H3K27me3 are changed in  $H3^{K36R}$  and  $H3^{K36A}$  mutants. In the case of  $H3^{K36R}$   
291 mutants, we compared these profiles in cells from imaginal disc and CNS tissues dissected from  
292 late-stage third instar  $H3^{K36R}$  and wildtype larvae, and in the case of  $H3^{K36A}$  mutants we  
293 compared the profiles in late-stage  $H3^{K36A}$  and wildtype embryos. As expected from the  
294 Western blot analyses (**Figure 4A, B**), H3K36me2 levels across the genome were strongly  
295 diminished, both in  $H3^{K36R}$  mutant larvae and in  $H3^{K36A}$  mutant embryos (**Figure 4C-F**,  
296 **Supplementary Figure 8, Table S2**). The H3K27me3 profiles confirmed that the levels of  
297 this modification were reduced in  $H3^{K36R}$  mutant larvae (**Figure 4C**). While the average  
298 reduction was only about two-fold, H3K27me3 levels were particularly strongly diminished at  
299 canonical PRC2 target genes such as the HOX genes that in wildtype animals are decorated  
300 with high-levels of H3K27me3 (**Figure 4C, E, Supplementary Figure 8, Table S2**).  
301 Specifically, at the HOX genes *Ultrabithorax* (*Ubx*), *abdominal-A* (*abd-A*), *Abdominal-B* (*Abd-*  
302 *B*) or *Antennapedia* (*Antp*), H3K27me3 levels in  $H3^{K36R}$  mutants were between 3- and 4-fold

303 lower than in wildtype (**Figure 4C, E**). As expected from the Western blot analyses (**Figure**  
304 **4B**),  $H3^{K36A}$  mutant embryos did not show a general reduction in the H3K27me3 profile (**Figure**  
305 **4D**). However, H3K27me3 levels were 1,5-fold reduced across the HOX genes (**Figure 4D,**  
306 **F**). In *Drosophila* with  $H3^{K36R}$  or  $H3^{K36A}$  chromatin, PRC2 therefore appears to be unable to  
307 generate high levels of H3K27me3 at Polycomb target genes.

308

### 309 **Polycomb repression of HOX genes is impaired in *Drosophila* with $H3^{K36R}$ or $H3^{K36A}$** 310 **mutant chromatin**

311 The PcG-like phenotypes in the rare  $H3^{K36R}$  mutant animals that survive into pharate adults and  
312 the reduction of H3K27me3 levels at HOX genes in these mutants prompted us to analyse  
313 whether and how expression of these genes is altered in  $H3^{K36R}$  and  $H3^{K36A}$  mutants. In a first  
314 set of experiments, we analysed HOX gene expression in embryos. Both mutants showed  
315 stochastic misexpression of *Abd-B* in single cells in late stage embryos (**Figure 5A**). *Abd-B*  
316 misexpression in  $H3^{K36R}$  and  $H3^{K36A}$  mutant embryos was however clearly less widespread than  
317 in  $H3^{K27R}$  mutant embryos or in embryos lacking the PRC2 subunit Esc that are shown for  
318 comparison (**Figure 5A**). Moreover, we were unable to detect misexpression of *Antp* or *Ubx*  
319 in  $H3^{K36R}$  or  $H3^{K36A}$  mutant embryos.

320 We next analysed HOX gene expression in imaginal discs and CNS tissues from third  
321 instar  $H3^{K36R}$  mutant larvae. In the CNS of every single mutant individual, *Ubx* was widely  
322 misexpressed in many single cells in an apparently stochastic pattern (**Figure 5B**). 50% of the  
323  $H3^{K36R}$  mutant larvae also showed stochastic misexpression of *Ubx* in individual cells in the  
324 wing pouch of the wing imaginal disc (**Figure 5C**). *Ubx* misexpression in  $H3^{K36R}$  mutant wing  
325 discs was less widespread than in  $H3^{K27R}$  mutants that are shown for comparison (**Figure 5C**).  
326 Finally, we found that 100% of the  $H3^{K36R}$  mutant larvae showed misexpression of *Antp* in the  
327 antenna primordium of the eye-antennal disc (**Figure 5D**). We also observed this  
328 misexpression in clones of  $H3^{K36A}$  homozygous cells that we had induced in  $H3^{K36A}$   
329 heterozygous animals (**Figure 5D**) and in  $H3^{K27R}$  mutant clones that were induced as control  
330 (**Figure 5D**). *Drosophila* with chromatin consisting of  $H3^{K36R}$  or  $H3^{K36A}$  nucleosomes therefore

331 show stochastic misexpression of multiple HOX genes. The most straightforward interpretation  
332 of this misexpression is that it is caused by defective Polycomb repression as a result of the  
333 reduced H3K27me3 levels in HOX gene chromatin.

334

335

## 336 **DISCUSSION**

337 Understanding how PRC2 binds chromatin and how it is regulated is essential for understanding  
338 how the complex marks genes for Polycomb repression to maintain cell fate decisions. The  
339 work in this study leads to the following main conclusions. First, the structure of nucleosome-  
340 bound PHF1-PRC2 allowed to visualize how interaction of the catalytic lobe of the complex  
341 with the substrate nucleosome threads the histone H3 N-terminus into the active site of EZH2  
342 through a relay of contacts. Second, structure-guided mutational analyses showed that DNA-  
343 binding by the EZH2<sub>CXC</sub> domain is critical for productive PRC2-nucleosome interactions. Third,  
344 unmodified H3K36 is accommodated in a key position in the EZH2<sub>CXC</sub>-DNA interface and  
345 while H3K36 provides the correct fit, the methylated forms H3K36me2/3, or mutated H3K36R  
346 or H3K36A do not seem to fit because they strongly diminish H3K27 methylation. Fourth,  
347 H3K36 is also critical for normal H3K27 methylation *in vivo* because *Drosophila* with H3<sup>K36R</sup>  
348 or H3<sup>K36A</sup> mutant chromatin show reduced levels of H3K27me3 and fail to fully maintain  
349 Polycomb repression at HOX target genes. In the following, we shall discuss key aspects of  
350 these new findings in the context of our previous knowledge of PRC2 regulation and function.

351

### 352 **Different forms of PRC2 use the same molecular interactions for binding the H3 N-** 353 **terminus on substrate nucleosomes**

354 Unlike many other histone-modifying enzymes (e.g. (McGinty et al., 2014; Worden et al.,  
355 2019)), PRC2 does not recognize the nucleosome by docking on its acidic patch (Luger et al.,  
356 1997) to engage with the histone substrate. Instead, the complex interacts with chromatin by  
357 binding to the DNA gyres on the nucleosome ((Poepsel et al., 2018), this study). Previous  
358 studies that had measured the binding affinity and residence time of PRC2 on nucleosomes and

359 free DNA had found that DNA-binding makes the largest make contribution to the chromatin-  
360 binding affinity of PRC2 (Choi et al., 2017; Wang et al., 2017). The mutational analyses here  
361 establish that interaction of highly conserved residues in the EZH2<sub>CXC</sub> domain with the DNA  
362 on the substrate nucleosome is critical for H3K27 methylation (**Figure 2C**). Moreover, this  
363 interaction sets the register for a network of interactions of the H3 N-terminus with the EZH2  
364 surface that permits H3K27 to reach into the active site (**Figure 1 D, F**). Consistent with our  
365 findings here, an independent recent study of a cryo-EM structure of PRC2 with co-factors  
366 JARID2 and AEBP2 bound to a mononucleosome with monoubiquitylated H2A (Kasinath et  
367 al., 2020) identified very similar interactions of EZH2 with the nucleosomal DNA and the H3  
368 N-terminus. Different forms of PRC2 that contain different accessory proteins and dock in  
369 different ways on chromatin therefore contact the substrate H3 N-terminus in the nucleosome  
370 through similar interactions.

371

372 **The position of H3K36 in the EZH2<sub>CXC</sub>-nucleosome interface enables allosteric regulation**  
373 **by H3K36 methylation**

374 Important novel insight from our structure came from the observation that unmodified H3K36  
375 is located in a critical position in the EZH2<sub>CXC</sub>-DNA interface. Unmodified H3K36 has the  
376 right fit for interaction of the H3 N-terminus with the EZH2 surface and placement of H3K27  
377 in the active site. The inhibition of H3K27 mono-, di- and tri-methylation on nucleosomes  
378 carrying H3K36me<sub>2</sub> or -me<sub>3</sub> (Schmitges et al., 2011; Yuan et al., 2011) or on H3<sup>K36R</sup> or H3<sup>K36A</sup>  
379 nucleosomes (**Figure 3C**) suggests that these alterations of the H3K36 side chain impair the  
380 interaction of H3K27 with the active site of EZH2. On isolated H3 N-terminal peptides,  
381 H3K36me<sub>3</sub> did not inhibit the formation of H3K27me<sub>1</sub> (**Figure 3D**), consistent with earlier  
382 findings that on peptide substrates H3K36me<sub>3</sub> only has a minor effect on the k<sub>cat</sub> of H3K27  
383 methylation (Schmitges et al., 2011) (Jani et al., 2019). Also, H3K36me<sub>3</sub> does not diminish  
384 the affinity of PRC2 for binding to mononucleosomes (**Figure 3A, B**) and does not reduce the  
385 residence time of PRC2 on nucleosome arrays (Guidotti et al., 2019). Taken together, a possible  
386 scenario would therefore be that within the time frame of the PRC2 nucleosome binding and

387 reaction cycle, docking of the H3K36 side chain in the EZH2<sub>CXC</sub>-DNA interface is critical for  
388 rapid alignment of the H3 N-terminus on the EZH2 surface into a catalytically competent state.  
389 According to this view, H3K36me<sub>2/3</sub> does not locally disrupt nucleosome binding but  
390 allosterically inhibits H3K27 from interacting with the EZH2 active site.

391

392 **H3K27 methylation and Polycomb repression are defective in *Drosophila* with H3<sup>K36R</sup> or**  
393 **H3<sup>K36A</sup> chromatin**

~~394~~ I The finding that PRC2 is inhibited on H3<sup>K36R</sup> and H3<sup>K36A</sup> nucleosomes *in vitro* had prompted  
395 us to use a genetic histone replacement strategy in *Drosophila* (Günesdogan et al., 2010)  
396 (McKay et al., 2015) to assess PRC2 inhibition on H3<sup>K36R</sup> or H3<sup>K36A</sup> chromatin *in vivo*. Previous  
397 studies had found that *Drosophila* H3<sup>K36R</sup> mutants are able to develop into the pupal stages and,  
398 consistent with this late developmental arrest, whole third instar larvae were found to show only  
399 relatively minor changes in their transcriptome compared to wildtype animals (McKay et al.,  
400 2015; Meers et al., 2017). Here, we found that a few rare H3<sup>K36R</sup> mutant animals even survive  
401 into pharate adults and that these show remarkably little morphological defects apart from  
402 homeotic transformations characteristic of Polycomb mutants (**Figure S7**). We show that these  
403 phenotypes are caused by defective Polycomb repression of multiple HOX genes (**Figure 5**)  
404 and that they are linked to reduced levels of H3K27me<sub>3</sub> at these genes (**Figure 4**). A simple  
405 straightforward explanation for these phenotypes in H3<sup>K36R</sup> or H3<sup>K36A</sup> mutant animals is that  
406 PRC2 is unable to effectively deposit high levels of H3K27me<sub>3</sub> on the H3<sup>K36R</sup> or H3<sup>K36A</sup>  
407 nucleosomes, respectively, in their chromatin. Accordingly, H3K27me<sub>3</sub> levels at HOX genes  
408 are below the threshold needed to reliably maintain Polycomb repression and consequently,  
409 HOX genes become stochastically misexpressed in a fraction of cells. Finally, we note that in  
410 H3<sup>K36R</sup> mutant larvae, the experimental setting where we have been able to generate the most  
411 complete replacement of H3 by H3<sup>K36R</sup>, H3K27me<sub>3</sub> levels at HOX genes were only about 3- to  
412 4-fold reduced compared to wildtype (**Figure 4C**). However, as shown in **Figure 3C**, on  
413 nucleosomes *in vitro*, H3K36me<sub>3</sub> inhibited PRC2 more effectively than H3<sup>K36R</sup> or H3<sup>K36A</sup>. It  
414 therefore seems likely that in contrast to the H3<sup>K36R</sup> and H3<sup>K36A</sup> mutants that we have used as

415 proxy, H3K36me2 and H3K36me3 *in vivo* also inhibit PRC2 more effectively from depositing  
416 H3K27me3 on H3K36me2- or H3K36me3-modified nucleosomes in transcriptionally active  
417 chromatin.

418

#### 419 **Concluding remark**

420 The structural, biochemical and genetic work reported in this study shows that it is the exquisite  
421 geometry formed by a relay of interactions between the PRC2 enzyme, nucleosomal DNA and  
422 the H3 N-terminus that enable the histone methylation marks H3K36me2 and H3K36me3 in  
423 transcriptionally active chromatin to allosterically prevent PRC2 from depositing the repressive  
424 histone methylation mark H3K27me3 at transcribed genes.

425

426

## 427 **MATERIALS AND METHODS**

428

### 429 Protein expression and purification

430 Human PHF1-PRC2 wild-type (wt) complex was expressed and purified as previously  
431 described (Choi et al., 2017). In brief, an optimized ratio of the baculoviruses for the different  
432 PHF1-PRC2 subunits was used to infect HiFive cells (Invitrogen). Cell were lysed using a glass  
433 Dounce homogenizer and the complex was purified using affinity chromatography (Ni-NTA  
434 and Strep-tag), followed by simultaneous TEV mediated protease tag cleavage and Lambda  
435 Phosphatase treatment (obtained from the MPI of Biochemistry Protein Core facility) and a  
436 final size exclusion chromatography (SEC) step in a buffer containing 25 mM Hepes, pH 7.8,  
437 150 mM NaCl, 10% glycerol, 2 mM DTT.

438 PRC2<sup>CXC>A</sup>, PRC2<sup>EED>A</sup> and PRC2<sup>CXC>A/EED>A</sup> mutants were generated by PCR with primers  
439 containing the desired mutations, subsequent ligation and transformation. Expression and  
440 purification were performed as above.

441 *Xenopus laevis* (*X.l.*) and *Drosophila melanogaster* (*D.m.*) histones were expressed and purified  
442 from inclusion bodies as described in (Luger et al., 1999). To mimic the inhibitory mark  
443 H3K36me3 or the allosteric activating mark H3K27me3, the cysteine side chain of a mutated  
444 *D.m.* histone H3<sup>C110A K36C</sup> or *X.l.* histone H3<sup>C110A K27C</sup> was alkylated with (2-bromoethyl)  
445 trimethylammonium bromide (Sigma Aldrich) as described previously (Simon et al., 2007).  
446 Nucleosomes containing these modifications are abbreviated with e.g. H3Kc36me3.

447

448 For histone octamers, equimolar amounts of histones H2A, H2B, H4 and H3 (wt, H3<sup>K36A</sup>,  
449 H3<sup>K36R</sup>, H3Kc27me3 or H3Kc36me3) were mixed and assembled into octamers in high salt  
450 buffer containing 10 mM Tris-HCL pH 7.5, 2 M NaCl, 1 mM EDTA, 5 mM  $\beta$ -mercaptoethanol.  
451 Subsequent SEC was performed to separate octamers from H3/H4 tetramers or H2A/H2B  
452 dimers (Luger et al., 1999).

453

### 454 Reconstitution of nucleosomes:

455 For *X.l.* and *D.m.* mononucleosomes used in biochemical assays, 6-carboxyfluorescein (6-FAM)-  
456 labeled 215 bp 601 DNA (Lowary and Widom, 1998) was PCR amplified from the p601



457 plasmid, purified on a MonoQ column (GE Healthcare), precipitated with ethanol and dissolved  
458 in the same high salt buffer used for octamers. Optimized ratios of octamer to DNA (usually  
459 ranging between 0.8-1.3 : 1) were mixed and nucleosomes were reconstituted by gradient and  
460 stepwise dialysis against low salt buffers to a final buffer containing 25 mM Hepes, pH 7.8, 60  
461 mM NaCl, 2 mM DTT.

462  
463 X.I. asymmetrical dinucleosomes for cryo-EM studies containing one unmodified substrate  
464 nucleosome and one H3K27me3-modified (allosteric) nucleosome connected with a 35 bp  
465 linker DNA were reconstituted using the protocol described in (Poepsel et al., 2018). In brief,  
466 substrate nucleosomes and allosteric nucleosomes were separately assembled on the respective  
467 *DraIII* digested nucleosomal DNA. The latter was generated by PCR with primers introducing  
468 the desired linker and *DraIII* recognition sites and purified as described above. The assembled  
469 nucleosomes were purified on a preparative native gel system (Biorad 491 prep cell). After  
470 ligation using T4 ligase (Thermo Fisher Scientific) the resulting dinucleosomes were purified  
471 from aberrant or non-ligated mononucleosomes by a second preparative native gel system  
472 (Biorad 491 prep cell). In contrast to (Poepsel et al., 2018), the dinucleosome DNA used in this  
473 study contained an additional 30 bp overhang on the substrate nucleosome, thus resulting in the  
474 following DNA sequence:

475  
476 5'–601 binding (allosteric nucleosome) – agcgatctCACCCCGTGatgctcgatactgtcata – 601  
477 binding (substrate nucleosome) – atgcatgcatatcattcgatctgagctcca –3' (after *DraIII* digestion,  
478 assembly of substrate/allosteric nucleosome and ligation to dinucleosomes).

479  
480 X.I. symmetrical unmodified dinucleosomes used for the HMTase assays with the PRC2<sup>CXC</sup>  
481 mutants were obtained by reconstituting octamers with a 377 bp DNA containing two 601  
482 sequences connected by a 35 bp linker DNA. A vector containing the 377 bp sequence was  
483 ordered from Invitrogen GeneArt and was used for PCR resulting in:

484  
485 5'–atatctcgggcttatgtgatggac – 601 binding (substrate nucleosome 1) –  
486 agcgatctcaacgagtgatgctcgatactgtcata – 601 binding (substrate nucleosome 2) –  
487 gtattgaacagcgactcgggatat–3'.

488  
489 The PCR products were purified as described above. Optimized ratios of octamer : DNA  
490 (usually ranging between 1.8-2.3 : 1) were mixed and nucleosomes were reconstituted by  
491 gradient and stepwise dialysis against low salt buffers to a final buffer containing 25 mM Hepes,  
492 pH 7.8, 60 mM NaCl, 2 mM DTT.

#### 493 494 Cryo-EM Data acquisition

495 Complexes of PHF1-PRC2 and asymmetrically modified 35 bp dinucleosomes were assembled  
496 and grids were prepared as described previously, with the difference of using 0.005% NP40  
497 instead of 0.01% (Poepsel et al., 2018). Cryo-EM data were collected on an FEI Titan Krios  
498 microscope operated at 300 kV and equipped with a post-column GIF and a K2 Summit direct  
499 detector (Gatan) operated in counting mode. A total of 3467 movies were collected at a nominal  
500 magnification of 81,000x (1.746 Å/pixel) at the specimen level using a total exposure of 53 e<sup>-</sup>  
501 / Å<sup>2</sup> distributed over 60 frames and a target defocus range from 1.5–3 µm. Data acquisition was  
502 carried out with SerialEM.

#### 503 504 Cryo-EM Data processing

505 Movies were aligned and corrected for beam-induced motion as well as dose compensated  
506 using MotionCor2 (Zheng et al., 2017). CTF estimation of the summed micrographs was  
507 performed with Gctf (Zhang, 2016) and particles were picked in Gautomatch ([http://www.mrc-](http://www.mrc-lmb.cam.ac.uk/kzhang/)  
508 [lmb.cam.ac.uk/kzhang/](http://www.mrc-lmb.cam.ac.uk/kzhang/) K. Zhang, MRC LMB, Cambridge, UK) using templates created from  
509 the AEBP2-PRC2-dinucleosome cryo-EM structure (EMD-7306, (Poepsel et al., 2018). All  
510 subsequent image processing steps were performed in Relion 3.0 (Zivanov et al., 2018) as

511 shown in Fig. S2. A total of 1,028,229 candidate particles were subjected to two rounds of  
512 initial 3D classification against a reference map (AEBP2-PRC2-dinucleosome low-pass filtered  
513 to 60 Å) and the Bayesian fudge factor (T value) set to 8. 330,482 remaining particles were  
514 subjected to two more rounds of 3D classification, this time using the best 3D model from the  
515 previous run as reference. Finally, the two best 3D models were 3D refined and further  
516 classified into 10 classes without translational and rotational sampling, using a T value of 4.  
517 From this run, the best 3D classes with the highest nominal overall resolution and rotational  
518 and translational accuracies were subjected to iterative rounds of 3D refinement, this time  
519 applying a soft mask for solvent flattening, per particle CTF refinement and Bayesian polishing.  
520 The highest nominal resolution was only achieved by combining several models from the  
521 previous 3D run, likely due to missing particle views in one or the other individual model. The  
522 final map after postprocessing had an overall nominal resolution of 5.2 Å, as determined from  
523 the gold-standard FSC criterion of 0.143 (Rosenthal and Henderson, 2003) (Fig. S1D). The  
524 density (Overall PHF1-PRC2:di-Nuc) with fitted models is shown in Fig.1A and in Fig. S1E  
525 using UCSF ChimeraX (Goddard et al., 2018). Local resolution estimation was performed in  
526 Relion 3.0 and is shown in Fig. S1B. The spherical angular distribution of all particles in the  
527 final model is shown in Fig. S1C.

528 To further improve the resolution and map details of the region around the H3 N-terminus,  
529 particle subtraction and focused 3D refinement was applied (Bai et al., 2015; Ilca et al., 2015;  
530 Zhou et al., 2015). Using a mask generated with UCSF Chimera (Pettersen et al., 2004) and  
531 Relion 3.0 the signal of the allosteric nucleosome as well as parts of PRC2 (EED and EZH2<sub>allo</sub>)  
532 was subtracted from all particle images. These signal subtracted particles were then subjected  
533 to focused 3D refinement using a soft mask around the substrate nucleosome and EZH2<sub>sub</sub>. This  
534 yielded a 4.4 Å map (EZH2<sub>sub</sub>-Nuc<sub>sub</sub>) (Fig. S3B). Local resolution estimation is shown in  
535 Fig.S3A. For model building and depiction, the final density was further sharpened (applied b  
536 – factor: - 66) using the Multisharpen function in Coot (Emsley et al., 2010) (e.g. in Figs. 1E,  
537 S3D, E and F).

538 To confirm the side chain information visible in the Coot sharpened map, Phenix Resolve  
539 density modification was run on the two half maps generated from the 3D refinement of the  
540 EZH2<sub>sub</sub>-Nuc<sub>sub</sub> map (Terwilliger et al., 2019). The resolution of the map according to Phenix  
541 cryo EM density modification output improved to 4 Å and the resulting map was used as an  
542 additional guideline for model building as well as for depiction (in Figs. S4 A-D).

#### 543 544 Cryo-EM data fitting, modeling and refinement

545 Available crystal structures were fitted into the final maps using rigid-body fitting in UCSF  
546 Chimera and all manual remodeling, morphing and building was performed in Coot. For PRC2,  
547 the crystal structure of the catalytic lobe of human PRC2 (PDB: 5HYN (Justin et al., 2016))  
548 was used. Since the SBD helix and the SANT1 helix bundle of the crystal structure was not  
549 accommodated well by the corresponding EM density, this region was fitted separately. A  
550 model of a dinucleosome with linker DNA (Supplementary dataset 1 in (Poepsel et al., 2018),  
551 including crystal structures of nucleosomes, PDB 3LZ1, also PDB 1AOI, also PDB 6T9L) was  
552 fitted.

553  
554 The above described overall model was then used as a starting model for fitting and building  
555 EZH2<sub>sub</sub>-Nuc<sub>sub</sub> into the focused map. Where possible, missing parts in the model were built de-  
556 novo, i.e. the H3 N-terminal tail (residues 30-37) between the catalytic site of PRC2 and the  
557 substrate histone. Available information from crystal structures was used as a guide (PRC2 with  
558 H3 peptide bound: PDB: 5HYN (Justin et al., 2016), and high resolution crystal structures of  
559 nucleosomes (PDB 1AOI and PDB 6T9L) (Luger et al., 1997). Parts of EZH2<sub>sub</sub>-Nuc<sub>sub</sub> model  
560 were then fitted using the morph fit routine in Coot or manually (Casañal et al., 2020).  
561 Secondary structure restraints for real-space refinement were generated automatically with  
562 phenix.secondary\_structure\_restraints (Sobolev et al., 2015) and manually curated. Hydrogens  
563 were added and the model was real-space refined with a resolution- cutoff of 4.4 Å with Phenix  
564 (Afonine et al., 2018) (phenix-1.18rc1-3777), using reference structures (PDB 6T9L and PDB

565 1AOI for nucleosome and one copy of the human PRC2 crystal structure generated from PDB  
566 5HYN), applying strict secondary structure and Ramachandran restraints.  
567 Our final model includes the modelled side chains of the fitted crystal/cryo-EM structures. This  
568 is in our opinion supported by the data as the substrate nucleosome protein core is resolved to  
569 app. 4 Å (Fig. S3A) and the map in these regions shows clear bulky side chain information (Fig  
570 S3D). The EZH2 density is of worse quality however even at lower resolution side chains likely  
571 contribute to the signal in the particle images and thereby an overall good model to map fit (in  
572 our case given by the high CC values as well as  $FSC_{\text{modelvsmap}}$ ) is arguably only ensured in the  
573 presence of side chains. However we caution readers against in interpreting our model at side  
574 chain resolution in poorly resolved regions.  
575 Structures were visualized with UCSF ChimeraX (Goddard et al., 2018) and PyMOL2  
576 (<https://pymol.org/2/>).  
577

#### 578 Electrophoretic mobility shift assay (EMSA)

579 EMSAs on a 1.2% agarose gel in 0.4x TBE Buffer with 45 nM 6-FAM - labeled  
580 mononucleosomes (unmodified wt *X.l.* for bandshifts with the PRC2<sup>CXC</sup> mutants, unmodified  
581 wt *D.m.* and *D.m.* H3Kc36me3 trimethyllysine analog containing nucleosomes) and increasing  
582 PRC2 concentrations (concentrations indicated in the figures above the gels) were performed  
583 in triplicates as described in (Choi et al., 2017). A Typhoon FLA 9500 scanner and the Fiji  
584 software was used for densitometric analysis of the 6-FAM signal (Schindelin et al., 2012).  
585 Background correction and calculation of the fractions of bound nucleosomes was performed  
586 with R using tidyverse (<https://www.r-project.org/>). In detail: two parts were boxed out in each  
587 lane: 1. unbound nucleosomes ('unbound' box) and 2. shifted nucleosomes ('bound',  
588 everything above 'unbound'). The boxed-out signals were integrated and background corrected  
589 by subtracting the respective control ('bound' background of lane 1 for 'bound' boxes and  
590 'unbound' background of lane 10 for 'unbound' boxes). To calculate the fraction of bound vs.  
591 unbound nucleosomes, the value for 'bound' nucleosome in each lane was divided by the total  
592 signal (sum of bound and unbound) of the same lane. Hill function fitting and illustration of  
593 the plot were subsequently performed with Prism 8 (GraphPad).  
594

#### 595 Histonemethyltransferase (HMTase) assay

596 For all HMTase assays, 446 nM of mononucleosomes or 223 nM of dinucleosomes were  
597 incubated with indicated amounts of the different PRC2 complexes, in a reaction buffer  
598 containing 20 mM HEPES pH 7.8, 50 mM NaCl, 2.5 mM MgCl<sub>2</sub>, 5% glycerol, 0.25 mM EDTA,  
599 0.5 mM DTT and 80 μM S-adenosylmethionine (SAM). Reactions were allowed to proceed for  
600 90 min at RT before quenching by the addition of 1x (final concentration) SDS loading buffer  
601 and heat inactivation at 95 °C for 5 min. Proteins were separated by electrophoresis on a 16%  
602 (w/v) SDS gel, transferred to a nitrocellulose membrane and probed with antibodies against  
603 H3K27me3 (Millipore, 07-449), H3K27me1 (Millipore, 07-448) and H4 (Abcam, ab10158).  
604 For quantification, HMTase reactions and the corresponding western blots on *D.m.* unmodified,  
605 H3Kc36me3, H3<sup>K36A/R</sup> mononucleosomes were performed in triplicates and subjected to  
606 densitometric analysis (Chemiluminescence signal, ImageQuant LAS 4000). The integrated  
607 densitometric signal (band) in each lane was background corrected against the control lane (lane  
608 1, no PRC2 in the reaction) and normalized with respect to the lane containing the highest  
609 amount (i.e. 100%) of PRC2 on unmodified nucleosomes (lane 4). The relative amounts of  
610 trimethylation/monomethylation for all other lanes were calculated with respect to lane 4.  
611 Graphical representations were made with Prism 8 (GraphPad).  
612

#### 613 Mass Spectrometry (MS)

614 500 nM of PRC2 were incubated with 2 μM of either unmodified or H3<sub>18-42</sub> peptide containing  
615 the K36me3 modification in HMTase reaction buffer (described above) and methyltransferase  
616 activity was allowed to proceed over night at RT. Reactions were then quenched with 1%  
617 trifluoroacetic acid (TFA). Home-made stage tips with poly(styrenedivinylbenzene) copolymer  
618 (SDB-XC) were used to remove PRC2 from the reactions (Rappsilber et al., 2007). First, stage  
619 tips were washed with methanol, followed by a second wash with buffer B (0.1% (v/v) formic

620 acid, 80% (v/v) acetonitrile). The SDB-XC material was then equilibrated with buffer A (0.1%  
621 (v/v) formic acid) and 40 µl of sample was applied and washed several times. Finally, samples  
622 were eluted using buffer B and introduced into the Bruker maXis II ETD mass spectrometer by  
623 flow injection of 20 µl sample using an Agilent HPLC at a flow rate of 250 µl/min and 0.05%  
624 TFA in 70% acetonitril:H<sub>2</sub>O as solvent for ESI-MS time-of-flight analysis.

625 Peptides were ionized at a capillary voltage of 4500 V and an end plate offset of 500 V.

626 Full scan MS spectra (200-1600 m/z) were acquired at a spectra rate of 1 Hz and a collision cell  
627 energy of 15 eV.

628 Raw data files were processed using Bruker Compass DataAnalysis. The m/z spectra were  
629 deconvoluted (maximum entropy method) with an instrument resolving power of 10,000 and  
630 the resulting neutral spectra peaks were integrated. For quantification, the experiment was  
631 performed in triplicates. The sum of the monomethylation peak areas was divided by the sum  
632 of the first 4 peaks of the input peptide together with the sum of the monomethylation peak  
633 areas. Illustration of the quantification was subsequently performed with Prism 8 (GraphPad).  
634 A Welch's t-test was calculated to show the nonsignificant difference between the activity of  
635 PRC2 on unmodified or H3K36me3 peptide.

636

### 637 Construction of histone transgenes to generate $H3^{K36A}$ and $H3^{K36R}$ strains

638 Site directed mutagenesis on *pENTR221-HisGU.WT*, *pENTRL4R1-HisGU.WT* and  
639 *pENTRR2L3-HisGU.WT* (Günesdogan et al., 2010) was used to mutate histone H3K36 to  
640 alanine or arginine. The final constructs *pfC31-attB-3xHisGU.H3K36A* and *pfC31-attB-*  
641 *3xHisGU.H3K36R* were generated by Gateway LR recombination of above vectors and  
642 integrated at attP sites VK33 (BDSC 9750) and 86Fb (BDSC 130437). The full genotypes of  
643 animals used in the study is described below.

644

### 645 Drosophila strains and genotypes

646 The following strains were used in this study:

647

648 *Oregon-R*

649

650 *w; Df(2L)His<sup>C</sup> FRT40A/ Df(2L)His<sup>C</sup> FRT40A; 12xHisGU<sup>wt</sup>/ 12xHisGU<sup>wt</sup>* (McKay et al., 2015)

651

652 *w; Df(2L)His<sup>C</sup> FRT40A/ CyO ubi-GFP; 12xHisGU<sup>H3K36R</sup>/TM6B* (McKay et al., 2015)

653

654 *w; Df(2L)His<sup>C</sup> FRT40A/ CyO twi:Gal4 UAS:GFP; 3xHisGU<sup>H3K36A</sup>(VK33) 3xHisGU<sup>H3K36A</sup>(86Fb)/ 3xHisGU<sup>H3K36A</sup>(VK33) 3xHisGU<sup>H3K36A</sup>(86Fb)*  
655 (generated in this study)

656

657 *w; Df(2L)His<sup>C</sup> FRT40A/ CyO ubi-GFP; 3xHisGU<sup>H3K27R</sup>(68E) 3xHisGU<sup>H3K27R</sup>(86Fb)/ 3xHisGU<sup>H3K27R</sup>(68E) 3xHisGU<sup>H3K27R</sup>(86Fb)* (Pengelly et al.,  
658 2013)

659

660 *w hs-flp; w; hs-nGFP FRT40A/ hs-nGFP FRT40; 3xHisGU<sup>H3K27R</sup>(68E) 3xHisGU<sup>H3K27R</sup>(86Fb)/ 3xHisGU<sup>H3K27R</sup>(68E) 3xHisGU<sup>H3K27R</sup>(86Fb)* (Pengelly  
661 et al., 2013)

662

663 *w hs-flp; M(2)25A ubi-GFP FRT40A/CyO*

664

665 *yw; esc<sup>6</sup> b pr / CyO, P[esc<sup>+</sup>]*

666

667 *ln(2LR) Gla / CyO, esc<sup>2</sup>*

668

669

670 The following genotypes were used for the experiments shown in:

671

### 672 **Figure 4A, C, E**

673 *wt: Df(2L) HisC FRT40/ Df(2L) HisC FRT40; 12xHisGU<sup>wt</sup>(VK33)/ 12xHisGU<sup>wt</sup>(VK33)*

674 *H3<sup>K36R</sup>: Df(2L) HisC FRT40/ Df(2L) HisC FRT40; 12xHisGU<sup>H3K36R</sup>(VK33)/TM6B*

675

### 676 **Figure 4B, D, F**

677 *wt: Oregon-R*

678 *H3<sup>K36A</sup>: w; Df(2L)His<sup>C</sup> FRT40A/ Df(2L)His<sup>C</sup> FRT40A; 3xHisGU<sup>H3K36A</sup>(VK33) 3xHisGU<sup>H3K36A</sup>(86Fb)/ 3xHisGU<sup>H3K36A</sup>(VK33) 3xHisGU<sup>H3K36A</sup>(86Fb)*

679

### 680 **Figure 5A**

681 *wt: Df(2L) HisC FRT40/ Df(2L) HisC FRT40; 12xHisGU<sup>wt</sup>(VK33)/ 12xHisGU<sup>wt</sup>(VK33)*

682 *H3<sup>K36R</sup>*: *Df(2L) HisC FRT40/ Df(2L) HisC FRT40; 12xHisGU<sup>H3K36R</sup>(VK33)/TM6B*  
683 *H3<sup>K36A</sup>*: *w; Df(2L)His<sup>C</sup> FRT40A/ Df(2L)His<sup>C</sup> FRT40A; 3xHisGU<sup>H3K36A</sup>(VK33) 3xHisGU<sup>H3K36A</sup>(86Fb)/ 3xHisGU<sup>H3K36A</sup>(VK33) 3xHisGU<sup>H3K36A</sup>(86Fb)*  
684 *H3<sup>K27R</sup>*: *w; Df(2L)His<sup>C</sup> FRT40A/ Df(2L)His<sup>C</sup> FRT40A; 3xHisGU<sup>H3K27R</sup>(68E) 3xHisGU<sup>H3K27R</sup>(86Fb)/ 3xHisGU<sup>H3K27R</sup>(68E) 3xHisGU<sup>H3K27R</sup>(86Fb)*  
685 *esc<sup>c</sup>*: *esc<sup>c</sup> b pr / CyO, esc<sup>c</sup> (esc<sup>mat</sup>-zyg- obtained as progeny from *esc<sup>c</sup> b pr/CyO, esc<sup>c</sup>* parents)*

### 687 **Figure 5B**

688 *wt*: *Df(2L) HisC FRT40/ Df(2L) HisC FRT40; 12xHisGU<sup>wt</sup>(VK33)/ 12xHisGU<sup>wt</sup>(VK33)*  
689 *H3<sup>K36R</sup>*: *Df(2L) HisC FRT40/ Df(2L) HisC FRT40; 12xHisGU<sup>H3K36R</sup>(VK33)/TM6B*

### 691 **Figure 5C**

692 *wt*: *Df(2L) HisC FRT40/ Df(2L) HisC FRT40; 12xHisGU<sup>wt</sup>(VK33)/ 12xHisGU<sup>wt</sup>(VK33)*  
693 *H3<sup>K36R</sup>*: *Df(2L) HisC FRT40/ Df(2L) HisC FRT40; 12xHisGU<sup>H3K36R</sup>(VK33)/TM6B*  
694 *H3<sup>K27R</sup>*: *w hs-flp; Df(2L)His<sup>C</sup> FRT40A/hs-nGFP FRT40A; 3xHisGU<sup>H3K27R</sup>(68E)3xHisGU<sup>H3K27R</sup>(86Fb)/3xHisGU<sup>H3K27R</sup>(68E)3xHisGU<sup>H3K27R</sup>(86Fb)*

### 696 **Figure 5D**

697 *wt*: *Df(2L) HisC FRT40/ Df(2L) HisC FRT40; 12xHisGU<sup>wt</sup>(VK33)/ 12xHisGU<sup>wt</sup>(VK33)*  
698 *H3<sup>K36R</sup>*: *Df(2L) HisC FRT40/ Df(2L) HisC FRT40; 12xHisGU<sup>H3K36R</sup>(VK33)/ TM6B*  
699 *H3<sup>K36A</sup>*: *w hs-flp; Df(2L)HisC FRT40A/ M(2)25AubiGFP FRT40; 3xHisGU<sup>H3K36A</sup>(VK33) 3xHisGU<sup>H3K36R</sup>(86Fb)/ +*  
700 *H3<sup>K27R</sup>*: *w hs-flp; Df(2L)HisC FRT40A/ M(2)25A ubi-GFP FRT40; 3xHisGU<sup>H3K27R</sup>(68E) 3xHisGU<sup>H3K27R</sup>(86Fb)/ +*

### 702 **Figure S7**

703 *wt*: *Df(2L) HisC FRT40/ Df(2L) HisC FRT40; 12xHisGU<sup>wt</sup>(VK33)/ 12xHisGU<sup>wt</sup>(VK33)*  
704 *H3<sup>K36R</sup>*: *Df(2L) HisC FRT40/ Df(2L) HisC FRT40; 12xHisGU<sup>H3K36R</sup>(VK33)/TM6B*  
705 *H3<sup>K36A</sup>*: *Df(2L)His<sup>C</sup> FRT40A/ Df(2L)His<sup>C</sup> FRT40A; 3xHisGU<sup>H3K36A</sup>(VK33) 3xHisGU<sup>H3K36A</sup>(86Fb)/ 3xHisGU<sup>H3K36A</sup>(VK33) 3xHisGU<sup>H3K36A</sup>(86Fb)*

## 708 Immunohistochemistry and immunofluorescence stainings

709 Embryos of the appropriate genotypes listed above were identified by the lack of GFP marked  
710 balancer chromosomes, fixed and stained with Abd-B antibody, following standard protocols.  
711 Imaginal discs from third instar larvae were stained with Antp and Cy3-labeled secondary  
712 antibodies following standard protocols. For clonal analysis (**Fig. 3D**), clones were induced 96  
713 hrs before analyses by heat-shocked induced expression of Flp recombinase in the genotypes  
714 listed above.

## 716 ChIP-seq analysis in *Drosophila* embryos and in larval tissues

717 *Embryo collection, chromatin preparation and ChIP*: 21-24 hr old *wt, H3<sup>K36A</sup>* embryos (see  
718 above for details of genotypes) were dechorionated, quick-frozen in liquid N<sub>2</sub> and stored at -  
719 80°C. 5 µL of thawed embryos were homogenized in 5 mL of fixing solution (60 mM KCl, 15  
720 mM NaCl, 4 mM MgCl<sub>2</sub>, 15 mM Hepes pH 7.6, 0.5% Triton X-100, 0.5 mM DTT, protease  
721 inhibitors, 0.9% Formaldehyde) at r.t.. The homogenate was filtered through a strainer (Greiner  
722 Bio-One, EASYstrainer™ 100 µm, #542 000) and incubated for 10 min with frequent gentle  
723 shaking. Cross-linking was stopped by the addition of 450 µL of 2.5 M Glycine. Fixed nuclei  
724 were washed with 1 mL of buffer A1 (60 mM KCl, 15 mM NaCl, 4 mM MgCl<sub>2</sub>, 15 mM Hepes  
725 pH 7.6, 0.5% Triton X-100, 0.5 mM DTT, protease inhibitors), washed with 1 mL of pre-lysis  
726 buffer (140 mM NaCl, 15 mM Hepes pH 7.6, 1 mM EDTA, 0.5 mM EGTA, 1% Triton X-100,  
727 0.5 mM DTT, 0.1% Na Deoxycholate, protease inhibitors), resuspended in 1 mL of lysis buffer  
728 (140 mM NaCl, 15 mM Hepes pH 7.6, 1 mM EDTA, 0.5 mM EGTA, 1% Triton X-100, 0.5  
729 mM DTT, 0.1% Na Deoxycholate, protease inhibitors, 0.1% SDS, 0.5% N-laurylsarcosine),  
730 incubated at least 10 min at 4°C with shaking, and transferred into milliTUBES 1 mL AFA  
731 Fiber (100) (Covaris, #520130) for sonication. Sonication was performed in a Covaris S220  
732 AFA instrument using the following setup: 140W (peak incident power) / 5% (duty cycle) / 200  
733 (cycle per burst) / 15 min. Insoluble material was removed by centrifugation in an Eppendorf  
734 centrifuge at 14000 rpm (10 min at 4°C). Input chromatin was quantified by measuring DNA  
735 concentration after decrosslinking using Qubit (Thermo Scientific) and 250 ng of chromatin  
736 were used for each ChIP experiment. 250 ng of an independently prepared batch of *D.*  
737 *pseudoobscura* chromatin were spiked-in in each ChIP experiment for subsequent  
738 normalization of the ChIP-seq datasets. The rest of the ChIP protocol was performed as  
739 described (Bonnet et al., 2019). For each condition, the ChIP experiment was performed in  
740 duplicates from two biologically independent chromatin. ChIP on hand-dissected CNS and  
741 imaginal disc tissues from 3<sup>rd</sup> instar *wt* or *H3<sup>K36R</sup>* homozygous larvae (see above for details on

742 genotypes) was performed as described (Laprell et al., 2017) with the difference *D.*  
743 *pseudoobscura* chromatin was spiked in at a 1:1 ratio of dm / dp chromatin.

744 *Library preparation and sequencing:* Library preparation for sequencing was performed with  
745 TruSeq kits from Illumina. Illumina systems (NextSeq 500) were used for paired-end DNA  
746 sequencing. All reads were aligned using STAR (Dobin et al., 2013) to the *D. melanogaster*  
747 dm6 genome assembly (Santos et al., 2015) and to the *D. pseudoobscura* dp3 genome assembly  
748 (Nov. 2004, FlyBase Release 1.03). Only sequences that mapped uniquely to the genome with  
749 a maximum of two mismatches were considered for further analyses.

750 *Identification of H3K36me2 and H3K27me3 enriched regions:* The Bioconductor STAN-  
751 package (Zacher et al., 2017) was used to define the location of H3K36me2-enriched regions.  
752 The seven chromosome arms (X, 2L, 2R, 3L, 3R, 4 and Y) defined in the dm6 genome assembly  
753 were segmented in 200 bp bins. STAN annotated each of these bins into 1 of 3 ‘genomic states’  
754 based on the number of H3K36me2 ChIP-seq reads and the number of input reads overlapping  
755 with each bin, in 21-24 hr wild-type embryos. These 3 ‘genomic states’ corresponded to:  
756 ‘H3K36me2 enriched’ regions; ‘low or no H3K36me2’ regions and ‘no input’ regions. The  
757 Poisson Lognormal distribution was selected and fitting of hidden Markov models was  
758 performed with a maximum number of 100 iterations. Stretches of consecutive bins annotated  
759 as ‘H3K36me2 enriched’ regions were sometimes separated by a few bins showing another  
760 type of annotation (i.e. ‘no input’). To define a relevant set of H3K36me2 enriched regions, we  
761 considered that if stretches of consecutive bins annotated as ‘H3K36me2 enriched’ regions are  
762 not separated by more than 7 Kb, they can be fused. High-level H3K27me3 domains previously  
763 defined using the same Bioconductor STAN-package in Bonnet et al (Bonnet et al., 2019) were  
764 used in this study.

765 *Normalization and visualisation of H3K27me3 and H3K36me2 ChIP-Seq datasets:* The  
766 proportion of *D. pseudoobscura* reads as compared to *D. melanogaster* reads in input and in  
767 samples was used to normalize the H3K36me2 and H3K27me3 ChIP-seq datasets from *H3<sup>K36A</sup>*  
768 and *H3<sup>K36R</sup>* mutants to the corresponding wild-type H3K36me2 and H3K27me3 ChIP-seq  
769 datasets respectively (see Table S2). Chip-seq tracks shown in Fig. 4 show the average of the  
770 two biological replicates that were performed for each condition. Y-axes of ChIP-seq tracks  
771 correspond to normalized numbers of mapped reads per million reads per 200 bp bin.

772 *Calculation of read coverage:* In wild-type and *H3<sup>K36A and R</sup>* mutant conditions, H3K36me2 and  
773 H3K27me3 ChIP-seq read coverages across gene bodies were computed on genomic intervals  
774 starting 750 bp upstream transcription start sites and ending 750 bp downstream transcription  
775 termination sites. Read coverage is defined as the normalized number of mapped reads per  
776 million reads from a ChIP-seq dataset divided by the number of mapped reads per million reads  
777 from the corresponding input dataset across a genomic region. Among the *D. melanogaster*  
778 Refseq genes, approximately 10800 and 9200 are overlapping with H3K36me2 enriched  
779 regions, approximately 1030 and 1030 genes are overlapping with high-level H3K27me3  
780 domains and 5400 and 6300 are localized in other genomic regions in embryos and larvae,  
781 respectively.

782

### 783 *Drosophila* nuclear and cell extracts for western blot analysis

784 For embryonic total nuclear extracts, nuclei from 21-24 hr old *wt*, *H3<sup>K36A</sup>* or *H3<sup>K36R</sup>* mutant  
785 embryos were purified and quantified as described (Bonnet et al., 2019). Pellets of nuclei were  
786 resuspended in appropriate volumes of SDS sample buffer proportional to the number of nuclei  
787 in each pellet. Extracts were then sonicated in a Bioruptor instrument (Diagenode) (8 cycles  
788 (30 sec ON / 30 sec OFF), high power mode), incubated at 75°C for 5 min and insoluble material  
789 was removed by centrifugation at 14000 rpm for 1 mn at r.t..

790 Total cell extracts from imaginal disc tissues were prepared by resuspending hand-dissected  
791 disc tissues in SDS sample buffer. Extracts were then sonicated, incubated at 75°C for 5 min  
792 and insoluble material was removed by centrifugation.

793

### 794 Antibodies

795 For ChIP analysis:

796 Rabbit monoclonal anti-H3K27me3

Cell Signaling Technology

#9733

|     |                                                             |                                            |         |
|-----|-------------------------------------------------------------|--------------------------------------------|---------|
| 797 | Rabbit polyclonal anti-H3K36me2                             | Abcam                                      | #9049   |
| 798 |                                                             |                                            |         |
| 799 | For Western blot analysis on embryonic and larval extracts: |                                            |         |
| 800 | Rabbit monoclonal anti-H3K27me3                             | Cell Signaling Technology                  | #9733   |
| 801 | Rabbit polyclonal anti- H3K27me3                            | Millipore                                  | #07-449 |
| 802 | Rabbit polyclonal anti-H3K27me1                             | Millipore                                  | #07-448 |
| 803 | Rabbit monoclonal anti-H3K36me3                             | Cell Signaling Technology                  | #4909   |
| 804 | Rabbit monoclonal anti-H3K36me2                             | Cell Signaling Technology                  | #2901   |
| 805 | Rabbit polyclonal anti-H2B                                  | (against full-length recombinant D.m. H2B) |         |
| 806 | Rabbit polyclonal anti-H4                                   | Abcam                                      | #10158  |
| 807 | Rabbit polyclonal anti-Caf1                                 | (Gambetta et al., 2009)                    |         |
| 808 |                                                             |                                            |         |
| 809 | For immunohistochemistry and immunofluorescence analysis:   |                                            |         |
| 810 | Mouse monoclonal anti-Abd-B                                 | DSHB (1A2E9)                               |         |
| 811 | Mouse monoclonal anti-Antp                                  | DSHB (8C11)                                |         |
| 812 |                                                             |                                            |         |

813

#### 814 **ACKNOWLEDGMENTS**

815 We thank Eva Nogales for generous advice, sharing of expertise and for hosting K.F. for grid  
816 preparation. We thank Tom Cech for stimulating discussions. We thank J.R. Prabu for  
817 excellent computing support, S.Uebel, E.Weyher, R.Kim and A.Yeroslaviz of the MPIB core  
818 facilities for excellent technical support and S.Schkoelziger and S.Schmähling for help with  
819 some of the experiments. This work was supported by the Deutsche Forschungsgemeinschaft  
820 (SFB1064) and the MPG. ChIP-seq data have been deposited in GEO (accession  
821 number: GSE148254).

822

823 **REFERENCES**

824

- 825 Afonine, P.V., Poon, B.K., Read, R.J., Sobolev, O.V., Terwilliger, T.C., Urzhumtsev, A.,  
826 Adams, P.D., 2018. Real-space refinement in PHENIX for cryo-EM and crystallography.  
827 *Acta Crystallogr D Struct Biol* 74, 531–544. doi:10.1107/S2059798318006551
- 828 Bai, X.-C., Rajendra, E., Yang, G., Shi, Y., Scheres, S.H.W., 2015. Sampling the  
829 conformational space of the catalytic subunit of human  $\gamma$ -secretase. *Elife* 4, 1485.  
830 doi:10.7554/eLife.11182
- 831 Ballaré, C., Lange, M., Lapinaite, A., Martin, G.M., Morey, L., Pascual, G., Liefke, R.,  
832 Simon, B., Shi, Y., Gozani, O., Carlomagno, T., Benitah, S.A., Di Croce, L., 2012. Phf19  
833 links methylated Lys36 of histone H3 to regulation of Polycomb activity. *Nat. Struct.*  
834 *Mol. Biol.* 19, 1257–1265. doi:10.1038/nsmb.2434
- 835 Bonnet, J., Lindeboom, R.G.H., Pokrovsky, D., Stricker, G., Çelik, M.H., Rupp, R.A.W.,  
836 Gagneur, J., Vermeulen, M., Imhof, A., Müller, J., 2019. Quantification of Proteins and  
837 Histone Marks in Drosophila Embryos Reveals Stoichiometric Relationships Impacting  
838 Chromatin Regulation. *Dev. Cell* 51, 632–644.e6. doi:10.1016/j.devcel.2019.09.011
- 839 Cai, L., Rothbart, S.B., Lu, R., Xu, B., Chen, W.-Y., Tripathy, A., Rockowitz, S., Zheng, D.,  
840 Patel, D.J., Allis, C.D., Strahl, B.D., Song, J., Wang, G.G., 2013. An H3K36  
841 methylation-engaging Tudor motif of polycomb-like proteins mediates PRC2 complex  
842 targeting. *Mol. Cell* 49, 571–582. doi:10.1016/j.molcel.2012.11.026
- 843 Casañal, A., Lohkamp, B., Emsley, P., 2020. Current developments in Coot for  
844 macromolecular model building of Electron Cryo-microscopy and Crystallographic Data.  
845 *Protein Sci.* 29, 1069–1078. doi:10.1002/pro.3791
- 846 Chen, S., Jiao, L., Liu, X., Yang, X., Liu, X., 2020. A Dimeric Structural Scaffold for PRC2-  
847 PCL Targeting to CpG Island Chromatin. *Mol. Cell* 77, 1265–1278.e7.  
848 doi:10.1016/j.molcel.2019.12.019
- 849 Chen, S., Jiao, L., Shubbar, M., Yang, X., Liu, X., 2018. Unique Structural Platforms of  
850 Suz12 Dictate Distinct Classes of PRC2 for Chromatin Binding. *Mol. Cell* 69, 840–  
851 852.e5. doi:10.1016/j.molcel.2018.01.039
- 852 Choi, J., Bachmann, A.L., Tauscher, K., Benda, C., Fierz, B., Müller, J., 2017. DNA binding  
853 by PHF1 prolongs PRC2 residence time on chromatin and thereby promotes H3K27  
854 methylation. *Nat. Struct. Mol. Biol.* 29, 1039. doi:10.1038/nsmb.3488
- 855 Copur, Ö., Gorchakov, A., Finkl, K., Kuroda, M.I., Müller, J., 2018. Sex-specific phenotypes  
856 of histone H4 point mutants establish dosage compensation as the critical function of  
857 H4K16 acetylation in Drosophila. *Proc Natl Acad Sci USA* 115, 13336–13341.  
858 doi:10.1073/pnas.1817274115
- 859 Dobin, A., Davis, C.A., Schlesinger, F., Drenkow, J., Zaleski, C., Jha, S., Batut, P., Chaisson,  
860 M., Gingeras, T.R., 2013. STAR: ultrafast universal RNA-seq aligner. *Bioinformatics* 29,  
861 15–21. doi:10.1093/bioinformatics/bts635
- 862 Dorafshan, E., Kahn, T.G., Glotov, A., Savitsky, M., Walther, M., Reuter, G., Schwartz, Y.B.,  
863 2019. Ash1 counteracts Polycomb repression independent of histone H3 lysine 36  
864 methylation. *EMBO Rep.* e46762. doi:10.15252/embr.201846762
- 865 Emsley, P., Lohkamp, B., Scott, W.G., Cowtan, K., 2010. Features and development of Coot.  
866 *Acta Crystallogr. D Biol. Crystallogr.* 66, 486–501. doi:10.1107/S0907444910007493
- 867 Francis, N.J., Kingston, R.E., Woodcock, C.L., 2004. Chromatin compaction by a polycomb  
868 group protein complex. *Science* 306, 1574–1577. doi:10.1126/science.1100576
- 869 Gambetta, M.C., Oktaba, K., Müller, J., 2009. Essential role of the glycosyltransferase  
870 *sxc/Ogt* in polycomb repression. *Science* 325, 93–96. doi:10.1126/science.1169727
- 871 Gaydos, L.J., Rechtsteiner, A., Egelhofer, T.A., Carroll, C.R., Strome, S., 2012. Antagonism  
872 between MES-4 and Polycomb repressive complex 2 promotes appropriate gene  
873 expression in *C. elegans* germ cells. *Cell Rep* 2, 1169–1177.  
874 doi:10.1016/j.celrep.2012.09.019



- 875 Goddard, T.D., Huang, C.C., Meng, E.C., Pettersen, E.F., Couch, G.S., Morris, J.H., Ferrin,  
876 T.E., 2018. UCSF ChimeraX: Meeting modern challenges in visualization and analysis.  
877 *Protein Sci.* 27, 14–25. doi:10.1002/pro.3235
- 878 Grau, D.J., Chapman, B.A., Garlick, J.D., Borowsky, M., Francis, N.J., Kingston, R.E., 2011.  
879 Compaction of chromatin by diverse Polycomb group proteins requires localized regions  
880 of high charge. *Genes Dev.* 25, 2210–2221. doi:10.1101/gad.17288211
- 881 Guidotti, N., Lechner, C.C., Bachmann, A.L., Fierz, B., 2019. A Modular Ligation Strategy  
882 for Asymmetric Bivalent Nucleosomes Trimethylated at K36 and K27. *Chembiochem*  
883 20, 1124–1128. doi:10.1002/cbic.201800744
- 884 Günesdogan, U., Jäckle, H., Herzig, A., 2010. A genetic system to assess in vivo the functions  
885 of histones and histone modifications in higher eukaryotes. *EMBO Rep.* 11, 772–776.  
886 doi:10.1038/embor.2010.124
- 887 Hansen, K.H., Bracken, A.P., Pasini, D., Dietrich, N., Gehani, S.S., Monrad, A., Rappsilber,  
888 J., Lerdrup, M., Helin, K., 2008. A model for transmission of the H3K27me3 epigenetic  
889 mark. *Nat. Cell Biol.* 10, 1291–1300. doi:10.1038/ncb1787
- 890 Henderson, R., Sali, A., Baker, M.L., Carragher, B., Devkota, B., Downing, K.H., Egelman,  
891 E.H., Feng, Z., Frank, J., Grigorieff, N., Jiang, W., Ludtke, S.J., Medalia, O., Penczek,  
892 P.A., Rosenthal, P.B., Rossmann, M.G., Schmid, M.F., Schröder, G.F., Steven, A.C.,  
893 Stokes, D.L., Westbrook, J.D., Wriggers, W., Yang, H., Young, J., Berman, H.M., Chiu,  
894 W., Kleywegt, G.J., Lawson, C.L., 2012. Outcome of the first electron microscopy  
895 validation task force meeting., in: Presented at the Structure (London, England : 1993),  
896 pp. 205–214. doi:10.1016/j.str.2011.12.014
- 897 Ilca, S.L., Kotecha, A., Sun, X., Poranen, M.M., Stuart, D.I., Huiskonen, J.T., 2015.  
898 Localized reconstruction of subunits from electron cryomicroscopy images of  
899 macromolecular complexes. *Nat Commun* 6, 8843–8. doi:10.1038/ncomms9843
- 900 Jani, K.S., Jain, S.U., Ge, E.J., Diehl, K.L., Lundgren, S.M., Müller, M.M., Lewis, P.W.,  
901 Muir, T.W., 2019. Histone H3 tail binds a unique sensing pocket in EZH2 to activate the  
902 PRC2 methyltransferase. *Proc. Natl. Acad. Sci. U.S.A.* 116, 8295–8300.  
903 doi:10.1073/pnas.1819029116
- 904 Jiao, L., Liu, X., 2015. Structural basis of histone H3K27 trimethylation by an active  
905 polycomb repressive complex 2. *Science* 350, aac4383–aac4383.  
906 doi:10.1126/science.aac4383
- 907 Justin, N., Zhang, Y., Tarricone, C., Martin, S.R., Chen, S., Underwood, E., De Marco, V.,  
908 Haire, L.F., Walker, P.A., Reinberg, D., Wilson, J.R., Gamblin, S.J., 2016. Structural  
909 basis of oncogenic histone H3K27M inhibition of human polycomb repressive complex  
910 2. *Nat Commun* 7, 11316. doi:10.1038/ncomms11316
- 911 Kasinath, V., Beck, C., Sauer, P., Poepsel, S., Kosmatka, J., Faini, M., Toso, D., Aebersold,  
912 R., Nogales, E., 2020. JARID2 and AEBP2 regulate PRC2 activity in the presence of  
913 H2A ubiquitination or other histone modifications. *bioRxiv* 2020.04.20.049213.
- 914 Kasinath, V., Faini, M., Poepsel, S., Reif, D., Feng, X.A., Stjepanovic, G., Aebersold, R.,  
915 Nogales, E., 2018. Structures of human PRC2 with its cofactors AEBP2 and JARID2.  
916 *Science* 359, 940–944. doi:10.1126/science.aar5700
- 917 Klymenko, T., Müller, J., 2004. The histone methyltransferases Trithorax and Ash1 prevent  
918 transcriptional silencing by Polycomb group proteins. *EMBO Rep.* 5, 373–377.  
919 doi:10.1038/sj.embor.7400111
- 920 Laprell, F., Finkl, K., Müller, J., 2017. Propagation of Polycomb-repressed chromatin requires  
921 sequence-specific recruitment to DNA. *Science* 356, 85–88. doi:10.1126/science.aai8266
- 922 Laugesen, A., Højfeldt, J.W., Helin, K., 2019. Molecular Mechanisms Directing PRC2  
923 Recruitment and H3K27 Methylation. *Mol. Cell* 74, 8–18.  
924 doi:10.1016/j.molcel.2019.03.011
- 925 Li, H., Liefke, R., Jiang, J., Kurland, J.V., Tian, W., Deng, P., Zhang, W., He, Q., Patel, D.J.,  
926 Bulyk, M.L., Shi, Y., Wang, Z., 2017. Polycomb-like proteins link the PRC2 complex to  
927 CpG islands. *Nature*. doi:10.1038/nature23881

- 928 Lowary, P.T., Widom, J., 1998. New DNA sequence rules for high affinity binding to histone  
929 octamer and sequence-directed nucleosome positioning. *J. Mol. Biol.* 276, 19–42.  
930 doi:10.1006/jmbi.1997.1494
- 931 Luger, K., Mäder, A.W., Richmond, R.K., Sargent, D.F., Richmond, T.J., 1997. Crystal  
932 structure of the nucleosome core particle at 2.8 Å resolution. *Nature* 389, 251–260.  
933 doi:10.1038/38444
- 934 Luger, K., Rechsteiner, T.J., Richmond, T.J., 1999. Preparation of nucleosome core particle  
935 from recombinant histones. *Meth. Enzymol.* 304, 3–19.
- 936 Margueron, R., Justin, N., Ohno, K., Sharpe, M.L., Son, J., Drury, W.J., Voigt, P., Martin,  
937 S.R., Taylor, W.R., De Marco, V., Pirrotta, V., Reinberg, D., Gamblin, S.J., 2009. Role  
938 of the polycomb protein EED in the propagation of repressive histone marks. *Nature* 461,  
939 762–767. doi:10.1038/nature08398
- 940 McGinty, R.K., Henrici, R.C., Tan, S., 2014. Crystal structure of the PRC1 ubiquitylation  
941 module bound to the nucleosome. *Nature* 514, 591–596. doi:10.1038/nature13890
- 942 McKay, D.J., Klusza, S., Penke, T.J.R., Meers, M.P., Curry, K.P., McDaniel, S.L., Malek,  
943 P.Y., Cooper, S.W., Tatomer, D.C., Lieb, J.D., Strahl, B.D., Duronio, R.J., Matera, A.G.,  
944 2015. Interrogating the function of metazoan histones using engineered gene clusters.  
945 *Dev. Cell* 32, 373–386. doi:10.1016/j.devcel.2014.12.025
- 946 Meers, M.P., Henriques, T., Lavender, C.A., McKay, D.J., Strahl, B.D., Duronio, R.J.,  
947 Adelman, K., Matera, A.G., 2017. Histone gene replacement reveals a post-  
948 transcriptional role for H3K36 in maintaining metazoan transcriptome fidelity. *Elife* 6,  
949 1191. doi:10.7554/eLife.23249
- 950 Musselman, C.A., Gibson, M.D., Hartwick, E.W., North, J.A., Gatchalian, J., Poirier, M.G.,  
951 Kutateladze, T.G., 2013. Binding of PHF1 Tudor to H3K36me3 enhances nucleosome  
952 accessibility. *Nat Commun* 4, 2969–9. doi:10.1038/ncomms3969
- 953 Nekrasov, M., Wild, B., Müller, J., 2005. Nucleosome binding and histone methyltransferase  
954 activity of *Drosophila* PRC2. *EMBO Rep.* 6, 348–353. doi:10.1038/sj.embor.7400376
- 955 Pengelly, A.R., Copur, Ö., Jäckle, H., Herzig, A., Müller, J., 2013. A histone mutant  
956 reproduces the phenotype caused by loss of histone-modifying factor Polycomb. *Science*  
957 339, 698–699. doi:10.1126/science.1231382
- 958 Pettersen, E.F., Goddard, T.D., Huang, C.C., Couch, G.S., Greenblatt, D.M., Meng, E.C.,  
959 Ferrin, T.E., 2004. UCSF Chimera—a visualization system for exploratory research and  
960 analysis. *J Comput Chem* 25, 1605–1612. doi:10.1002/jcc.20084
- 961 Poepsel, S., Kasinath, V., Nogales, E., 2018. Cryo-EM structures of PRC2 simultaneously  
962 engaged with two functionally distinct nucleosomes. *Nat. Struct. Mol. Biol.* 25, 154–162.  
963 doi:10.1038/s41594-018-0023-y
- 964 Rappsilber, J., Mann, M., Ishihama, Y., 2007. Protocol for micro-purification, enrichment,  
965 pre-fractionation and storage of peptides for proteomics using StageTips. *Nat Protoc* 2,  
966 1896–1906. doi:10.1038/nprot.2007.261
- 967 Rosenthal, P.B., Henderson, R., 2003. Optimal determination of particle orientation, absolute  
968 hand, and contrast loss in single-particle electron cryomicroscopy. *J. Mol. Biol.* 333,  
969 721–745. doi:10.1016/j.jmb.2003.07.013
- 970 Rosenthal, P.B., Rubinstein, J.L., 2015. Validating maps from single particle electron  
971 cryomicroscopy. *Curr. Opin. Struct. Biol.* 34, 135–144. doi:10.1016/j.sbi.2015.07.002
- 972 Santos, dos, G., Schroeder, A.J., Goodman, J.L., Strelets, V.B., Crosby, M.A., Thurmond, J.,  
973 Emmert, D.B., Gelbart, W.M., FlyBase Consortium, 2015. FlyBase: introduction of the  
974 *Drosophila melanogaster* Release 6 reference genome assembly and large-scale migration  
975 of genome annotations. *Nucleic Acids Res.* 43, D690–7. doi:10.1093/nar/gku1099
- 976 Schindelin, J., Arganda-Carreras, I., Frise, E., Kaynig, V., Longair, M., Pietzsch, T.,  
977 Preibisch, S., Rueden, C., Saalfeld, S., Schmid, B., Tinevez, J.-Y., White, D.J.,  
978 Hartenstein, V., Eliceiri, K., Tomancak, P., Cardona, A., 2012. Fiji: an open-source  
979 platform for biological-image analysis. *Nat. Methods* 9, 676–682.  
980 doi:10.1038/nmeth.2019
- 981 Schmitges, F.W., Prusty, A.B., Faty, M., Stützer, A., Lingaraju, G.M., Aiwazian, J., Sack, R.,  
982 Hess, D., Li, L., Zhou, S., Bunker, R.D., Wirth, U., Bouwmeester, T., Bauer, A., Ly-

- 983 Hartig, N., Zhao, K., Chan, H., Gu, J., Gut, H., Fischle, W., Müller, J., Thomä, N.H.,  
984 2011. Histone methylation by PRC2 is inhibited by active chromatin marks. *Mol. Cell*  
985 42, 330–341. doi:10.1016/j.molcel.2011.03.025
- 986 Simon, M.D., Chu, F., Racki, L.R., la Cruz, de, C.C., Burlingame, A.L., Panning, B.,  
987 Narlikar, G.J., Shokat, K.M., 2007. The site-specific installation of methyl-lysine analogs  
988 into recombinant histones. *Cell* 128, 1003–1012. doi:10.1016/j.cell.2006.12.041
- 989 Sobolev, O.V., Afonine, P.V., Adams, P.D., Urzhumtsev, A., 2015. Programming new  
990 geometry restraints: parallelity of atomic groups. *J Appl Crystallogr* 48, 1130–1141.  
991 doi:10.1107/S1600576715010432
- 992 Streubel, G., Watson, A., Jammula, S.G., Scelfo, A., Fitzpatrick, D.J., Oliviero, G., McCole,  
993 R., Conway, E., Glancy, E., Negri, G.L., Dillon, E., Wynne, K., Pasini, D., Krogan, N.J.,  
994 Bracken, A.P., Cagney, G., 2018. The H3K36me2 Methyltransferase Nsd1 Demarcates  
995 PRC2-Mediated H3K27me2 and H3K27me3 Domains in Embryonic Stem Cells. *Mol.*  
996 *Cell* 70, 371–379.e5. doi:10.1016/j.molcel.2018.02.027
- 997 Tan, Y.Z., Baldwin, P.R., Davis, J.H., Williamson, J.R., Potter, C.S., Carragher, B., Lyumkis,  
998 D., 2017. Addressing preferred specimen orientation in single-particle cryo-EM through  
999 tilting. *Nat. Methods* 14, 793–796. doi:10.1038/nmeth.4347
- 1000 Terwilliger, T.C., Ludtke, S.J., Read, R.J., Adams, P.D., Afonine, P.V., 2019. Improvement  
1001 of cryo-EM maps by density modification 58, 214–31. doi:10.1101/845032
- 1002 Wang, X., Paucek, R.D., Gooding, A.R., Brown, Z.Z., Ge, E.J., Muir, T.W., Cech, T.R.,  
1003 2017. Molecular analysis of PRC2 recruitment to DNA in chromatin and its inhibition by  
1004 RNA. *Nat. Struct. Mol. Biol.* 24, 1028–1038. doi:10.1038/nsmb.3487
- 1005 Worden, E.J., Hoffmann, N.A., Hicks, C.W., Wolberger, C., 2019. Mechanism of Cross-talk  
1006 between H2B Ubiquitination and H3 Methylation by Dot1L. *Cell* 176, 1490–1501.e12.  
1007 doi:10.1016/j.cell.2019.02.002
- 1008 Yu, J.-R., Lee, C.-H., Oksuz, O., Stafford, J.M., Reinberg, D., 2019. PRC2 is high  
1009 maintenance. *Genes Dev.* 33, 903–935. doi:10.1101/gad.325050.119
- 1010 Yuan, W., Xu, M., Huang, C., Liu, N., Chen, S., Zhu, B., 2011. H3K36 methylation  
1011 antagonizes PRC2-mediated H3K27 methylation. *J. Biol. Chem.* 286, 7983–7989.  
1012 doi:10.1074/jbc.M110.194027
- 1013 Zacher, B., Michel, M., Schwalb, B., Cramer, P., Tresch, A., Gagneur, J., 2017. Accurate  
1014 Promoter and Enhancer Identification in 127 ENCODE and Roadmap Epigenomics Cell  
1015 Types and Tissues by GenoSTAN. *PLoS ONE* 12, e0169249.  
1016 doi:10.1371/journal.pone.0169249
- 1017 Zhang, K., 2016. Gctf: Real-time CTF determination and correction. *J. Struct. Biol.* 193, 1–  
1018 12. doi:10.1016/j.jsb.2015.11.003
- 1019 Zheng, S.Q., Palovcak, E., Armache, J.-P., Verba, K.A., Cheng, Y., Agard, D.A., 2017.  
1020 MotionCor2: anisotropic correction of beam-induced motion for improved cryo-electron  
1021 microscopy. *Nat. Methods* 14, 331–332. doi:10.1038/nmeth.4193
- 1022 Zhou, Q., Huang, X., Sun, S., Li, X., Wang, H.-W., Sui, S.-F., 2015. Cryo-EM structure of  
1023 SNAP-SNARE assembly in 20S particle. *Cell Res.* 25, 551–560. doi:10.1038/cr.2015.47
- 1024 Zivanov, J., Nakane, T., Forsberg, B.O., Kimanius, D., Hagen, W.J., Lindahl, E., Scheres,  
1025 S.H., 2018. New tools for automated high-resolution cryo-EM structure determination in  
1026 RELION-3. *Elife* 7, 163. doi:10.7554/eLife.42166
- 1027  
1028  
1029

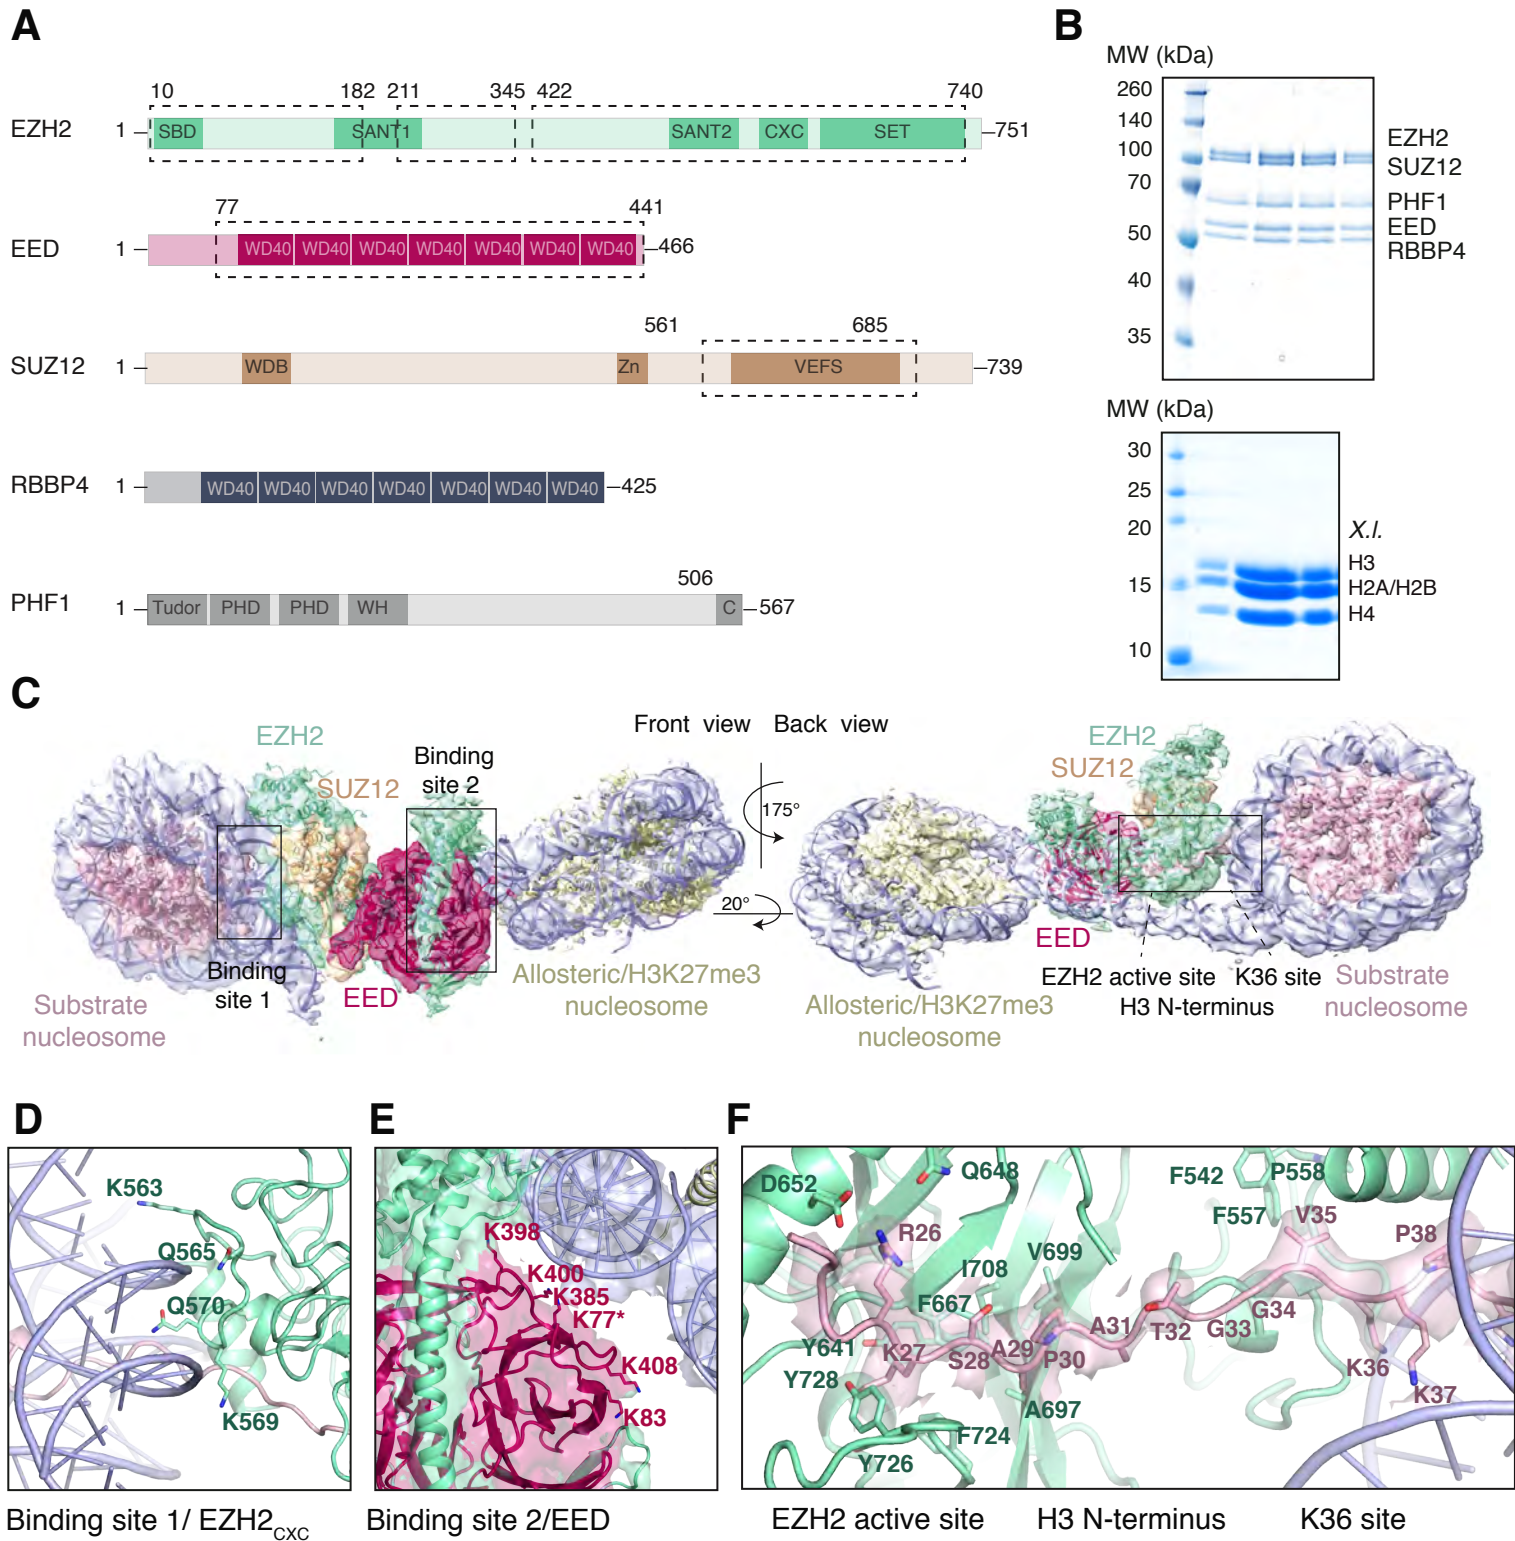

1030 **FIGURE 1**

1031 **Interaction of the PRC2 catalytic lobe with nucleosomal DNA orients the H3 N-terminus**  
1032 **for H3K27 binding to the active site.**

1033 (A) Domain organization in the five subunits of PHF1-PRC2. Dashed boxes indicate protein  
1034 portions visible in the PHF1-PRC2:di-Nuc cryo-EM reconstruction and fitted in the structural  
1035 model. In PHF1, C corresponds to the short C-terminal fragment used in PHF1<sub>C</sub>-PRC2.

1036 (B) Coomassie-stained SDS PAGE analysis of representative PHF1-PRC2 (upper panel)  
1037 and *X.l.* octamer preparations (lower panel) after size-exclusion chromatography (SEC)  
1038 purification. Pooled fractions of PHF1-PRC2, incubated with heterodimeric dinucleosomes  
1039 generated by DNA ligation of a reconstituted unmodified and a H3Kc27me3-modified  
1040 mononucleosome were used as input material for cryo-EM analysis.

1041 (C) Cryo-EM reconstruction of PHF1-PRC2:di-Nuc in two orientations with fitted crystal  
1042 structures of human PRC2 catalytic lobe (PDB: 5HYN, (Justin et al., 2016)) and nucleosomes  
1043 (1AOI, (Luger et al., 1997)) in a di-Nuc model with 35 bp linker DNA (see also  
1044 **Supplementary Figures 1-4, Table S1, Movie S1**). Density is colored as in (A) to show PRC2  
1045 subunits, DNA (blue) and octamers of substrate (pink) and allosteric (yellow) nucleosomes.  
1046 Boxes indicate regions shown in (D), (E) and (F), respectively.

1047 (D) Interaction of EZH2<sub>CXC</sub> residues with the DNA gyres of the substrate nucleosome; residues  
1048 mutated in PRC2<sup>CXC>A</sup> are indicated. For the H3 N-terminus (pink), only the peptide backbone  
1049 is shown in this view (see F).

1050 (E) Interface formed by EED and the EZH2 SBD domain with DNA gyres on the allosteric  
1051 nucleosome; residues mutated in PRC2<sup>EED>A</sup> are indicated. Asterisk indicates the approximate  
1052 location of a residue, which is not built in the model.

1053 (F) The H3 N-terminus (pink), shown as a pseudoatomic model fitted into the 4.4 Å density  
1054 map, is recognized by EZH2 through an extensive interaction network (see text). Note the well-  
1055 defined side-chain density of H3K36 (see also **Supplementary Figure 3D and 4C-E**).

1056

1057

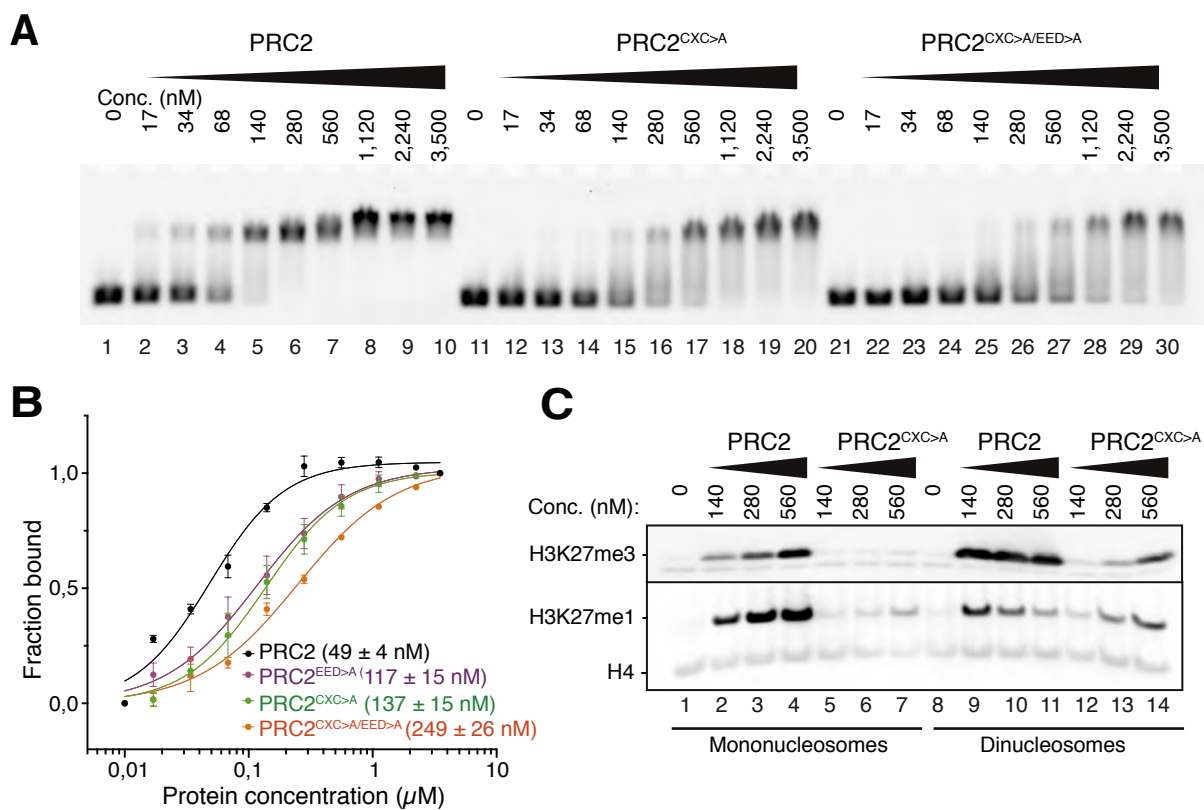

1058 **FIGURE 2**

1059 **The EZH2<sub>CXC</sub>-DNA interaction interface is critical for H3K27 methylation on**  
1060 **nucleosomes.**

1061 (A) Binding reactions with indicated concentrations of PRC2 (lanes 1-10), PRC2<sup>CXC>A</sup> (lanes  
1062 11-20) or PRC2<sup>CXC>A/EED>A</sup> (lanes 21-30) and 45 nM 6-carboxyfluorescein-labeled  
1063 mononucleosomes, analyzed by EMSA on 1.2% agarose gels; for analysis of PRC2<sup>EED>A</sup>  
1064 binding, see **Supplementary Figure 5A**.

1065 (B) Quantitative analysis of EMSA data in A by densitometry of 6-carboxyfluorescein signals  
1066 from independent experiments (n=3); error bars, SEM.

1067 (C) Western Blot (WB) analysis of H3K27me1 and H3K27me3 formation in HMTase reactions  
1068 with indicated concentrations of PRC2 and PRC2<sup>CXC>A</sup> on 446 nM mononucleosomes (lanes 1-  
1069 7) or 223 nM dinucleosomes (lanes 8-14). Note that these concentrations result in equal  
1070 numbers of nucleosomes and therefore equal numbers of H3 substrate molecules in the  
1071 reactions on mono- and dinucleosomes, as can be seen from the Coomassie-stained gel of the  
1072 reactions in **Supplementary Figure 5B**. H4 WB signal served as control for Western blot  
1073 processing.

1074

1075

1076

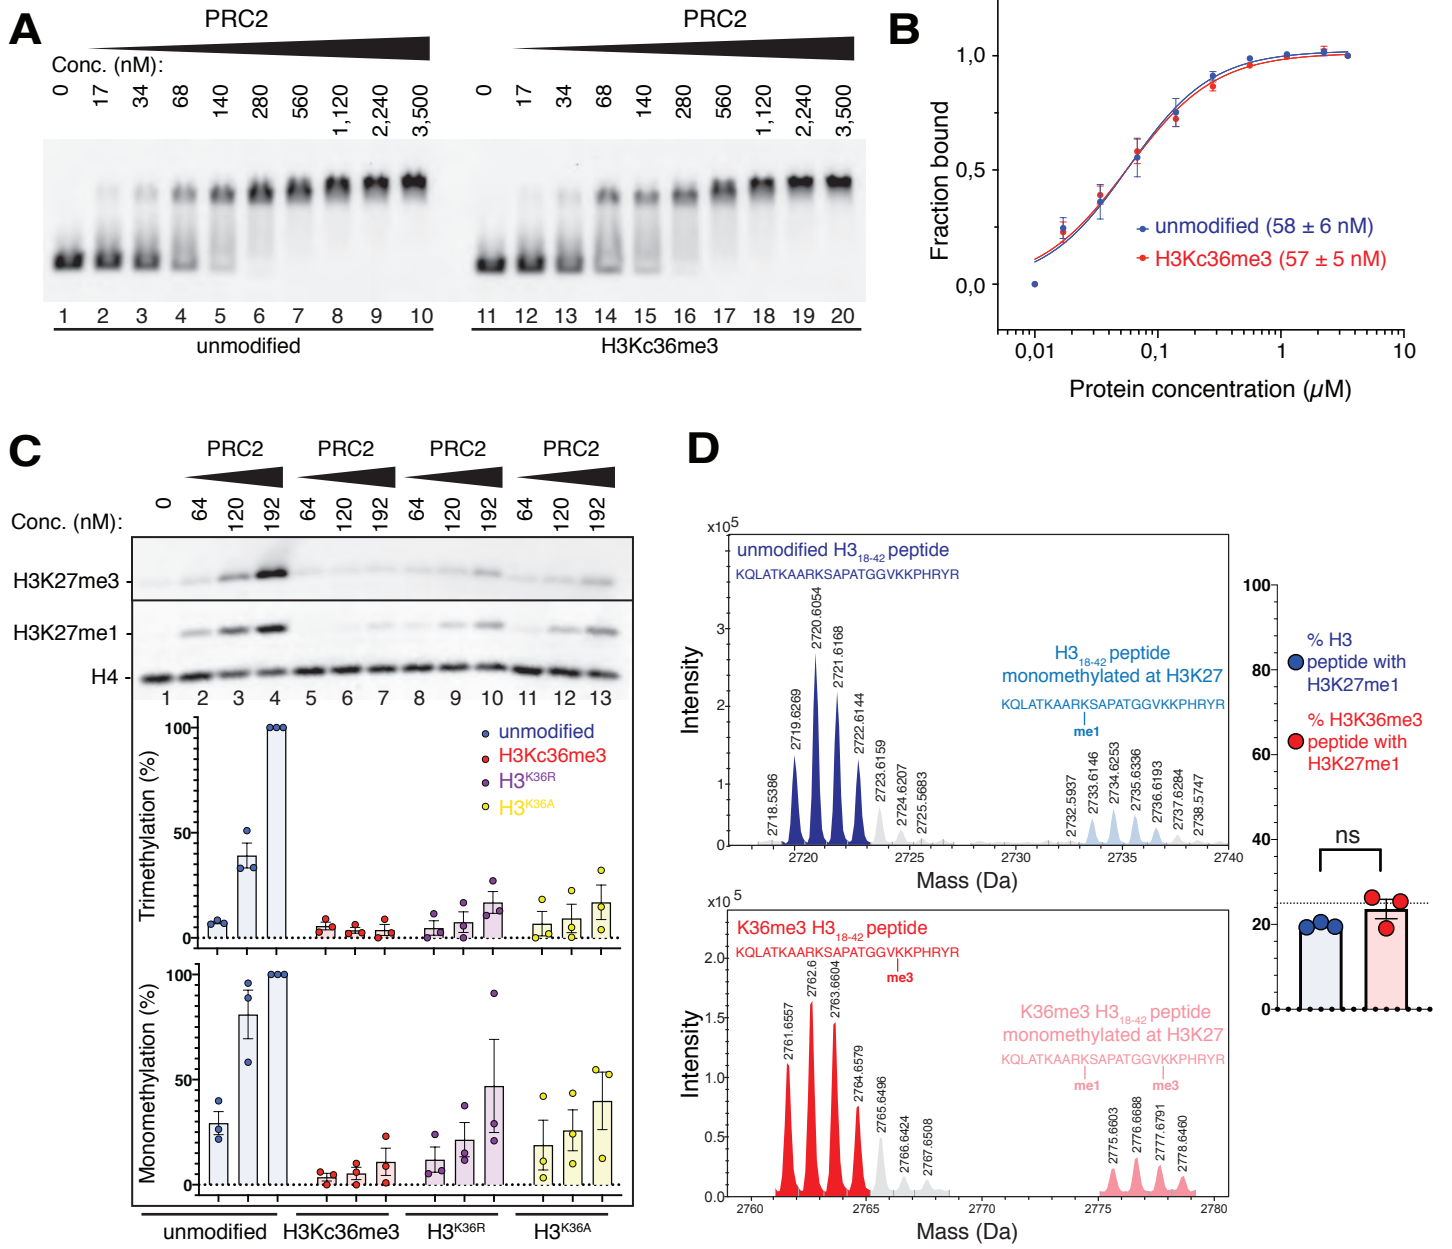



1077 **FIGURE 3**

1078 **The unmodified H3K36 side chain in the EZH2<sub>CXC</sub>-DNA interaction interface is critical**  
1079 **for H3K27 methylation on nucleosomes.**

1080 (A, B) EMSA analysis and quantification as in **Figure 2A and B**, using PRC2 and  
1081 mononucleosomes that were unmodified (lanes 1-10) or contained a trimethyllysine analog at  
1082 H3K36 (H3Kc36me3, lanes 11-20).

1083 (C) Western Blot (WB) analysis of HMTase reactions with PRC2 as in **Figure 2C** on  
1084 unmodified (lanes 1-4), H3Kc36me3 (lanes 5-7), H3<sup>K36R</sup> (lanes 8-10) or H3<sup>K36A</sup> (lanes 11-13)  
1085 mononucleosomes (446 nM). Coomassie stained gel of reactions is shown in **Supplementary**  
1086 **Figure 6A**. Bottom: quantification of H3K27me3 and H3K27me1 chemiluminescence signals,  
1087 respectively, by densitometry analysis from three independent experiments. In each experiment,  
1088 the methylation signal in lane 4 was defined as 100% and used to quantify the corresponding  
1089 H3K27 methylation signals in the other lanes on the same membrane. Circles show individual  
1090 data points and error bars SEM.

1091 (D) HMTase reactions monitoring H3K27me1 formation by PRC2 on H3<sub>18-42</sub> peptides that were  
1092 unmodified (top) or contained K36me3 (bottom). Left: Deconvoluted ESI-MS spectra from  
1093 data shown in **Supplementary Figure 6B**. On both substrates, areas of the four colored peaks  
1094 of H3K27me1-modified and unmodified substrate peptides were used for quantification of  
1095 H3K27me1 formation. Right: Symbols represent percentages of peptides carrying H3K27me1  
1096 in three independent experiments, error bars show SEM; Welch's t-test showed no significant  
1097 (ns) difference between H3K27 monomethylation on the two peptide substrates.

1098

1099

1100

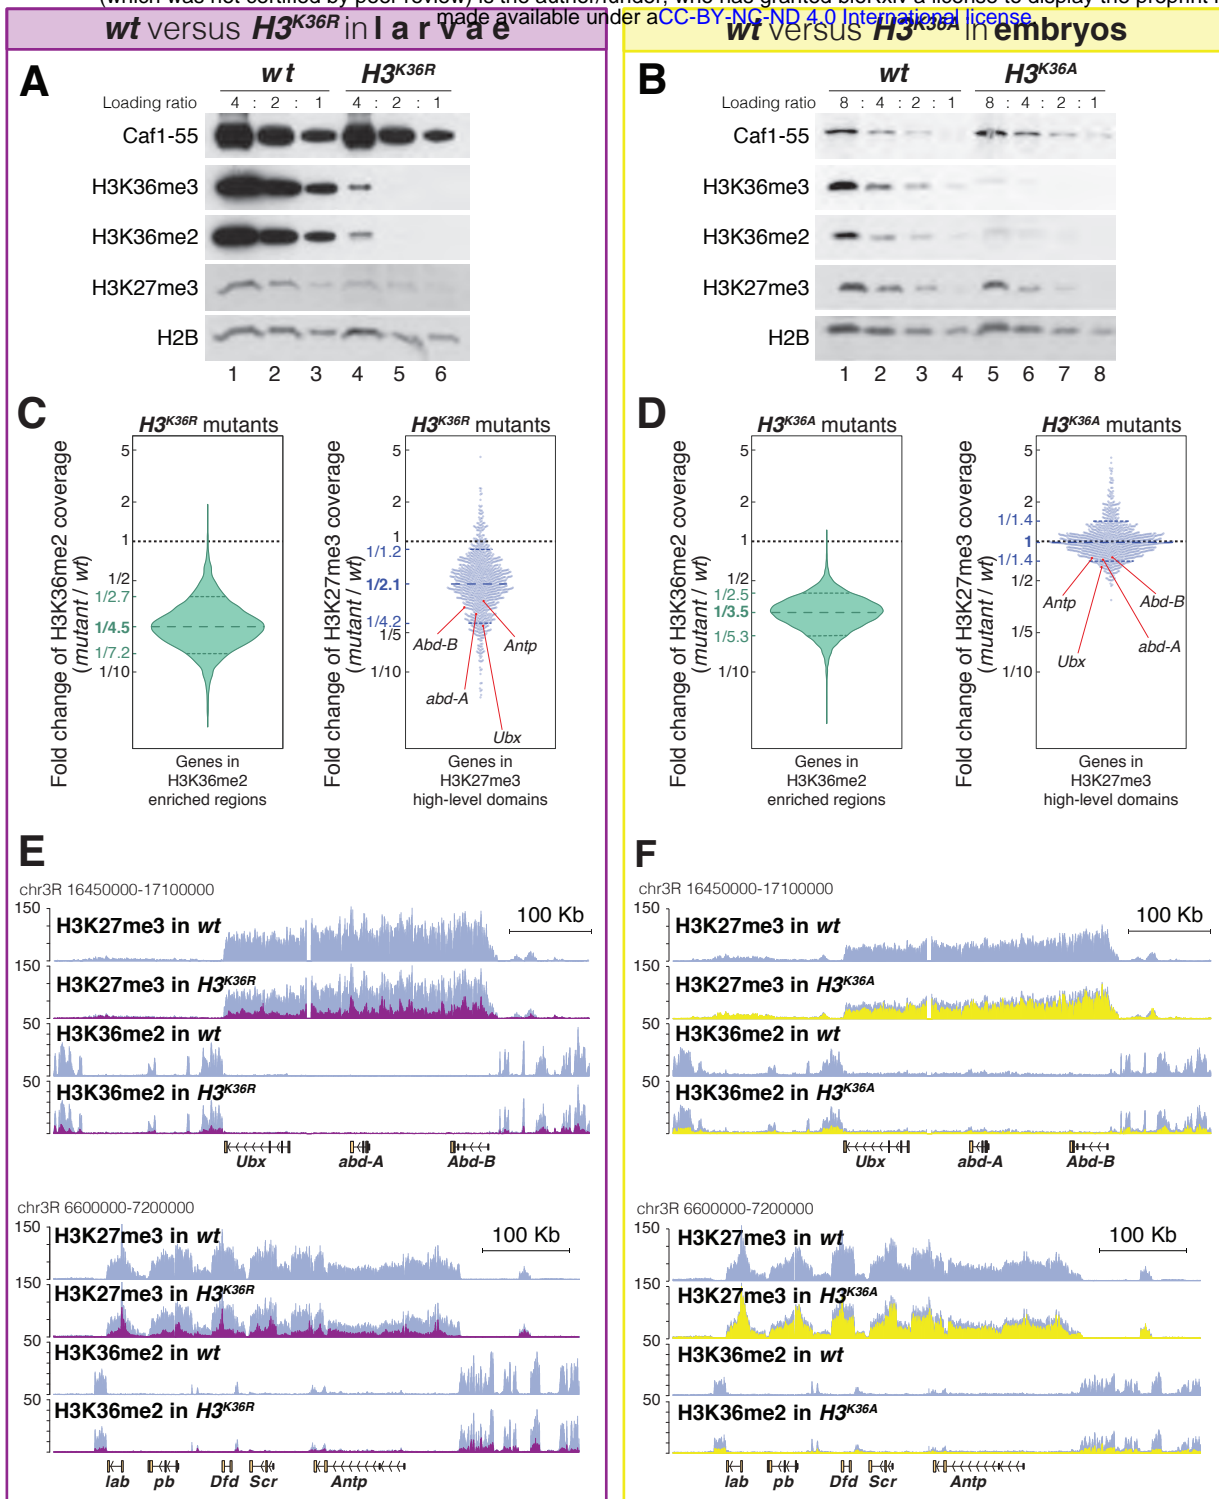

1101 **FIGURE 4**

1102 ***H3<sup>K36A</sup>* and *H3<sup>K36R</sup>* mutants show reduced levels of H3K27me3.**

1103 (A) Western blot analysis on serial dilutions (4:2:1) of total cell extracts from wing, haltere  
1104 and 3<sup>rd</sup> leg imaginal disc tissues dissected from *wildtype* (*wt*, lanes 1-3) and *H3<sup>K36R</sup>* mutant  
1105 (lanes 4-6) third instar larvae. Blots were probed with antibodies against H3K36me3,  
1106 H3K36me2 or H3K27me3; in each case, probing of the same membranes with antibodies  
1107 against Caf1-55 and H2B served as controls for loading and western blot processing. Note the  
1108 reduced levels of H3K36me3 and H3K36me2 but also of H3K27me3 in *H3<sup>K36R</sup>* mutants  
1109 compared to *wildtype* (*wt*) (see text). See Materials and Methods for details of all genotypes.

1110 (B) Western blot analysis on serial dilutions (8:4:2:1) of total nuclear extracts from 21-24 hr  
1111 old *wt* (lanes 1-4) and *H3<sup>K36A</sup>* mutant (lanes 5-8) embryos, probed with antibodies against  
1112 H3K36me3, H3K36me2 or H3K27me3; and with antibodies against Caf1-55 and H2B as  
1113 controls. Note that H3K36me3 and H3K36me2 levels are reduced in *H3<sup>K36R</sup>* mutants compared  
1114 to *wt* but that H3K27me3 levels appear undiminished in the mutant (see text).

1115 (C) Left, violin plot showing the fold-change of H3K36me2 coverage in *H3<sup>K36R</sup>* mutant larvae  
1116 relative to *wt* at genes that in wildtype larval CNS and imaginal disc tissues are decorated with  
1117 H3K36me2 (see Materials and Methods). The dashed line marks the median reduction (4.5-  
1118 fold), the dotted lines indicate indicated the interval comprising 80% of regions. Right, Bee  
1119 plot showing the fold-change of H3K27me3 coverage in *H3<sup>K36R</sup>* mutant larvae relative to *wt* at  
1120 genes that in wildtype larval CNS and imaginal disc tissues are associated with high-level  
1121 H3K27me3 regions (see Materials and Methods). The dashed line marks the median reduction  
1122 (2.1-fold), the dotted lines indicate the interval comprising 80% of regions. Note that  
1123 H3K27me3 coverage at the HOX genes *abd-A*, *Abd-B*, *Ubx* and *Antp* is between 3- and 4-fold  
1124 reduced.

1125 (D) Analysis and representation as in (C) but showing fold-changes in H3K36me2 and  
1126 H3K27me3 coverage in *H3<sup>K36A</sup>* mutant late-stage embryos relative to *wt* at genes that in  
1127 wildtype embryos are decorated with H3K36me2 and H3K27me3, respectively. Note that  
1128 H3K27me3 coverage at the HOX genes *abd-A*, *Abd-B*, *Ubx* and *Antp* is about 1.5-fold reduced.

1129 See also **Supplementary Figure 8**.

1130 **(E)** H3K27me3 and H3K36me2 ChIP-seq profiles in larval CNS and imaginal disc tissues  
1131 from *wt* (blue) and *H3<sup>K36R</sup>* mutant (purple) third instar larvae; in the tracks showing the profiles  
1132 in the *H3<sup>K36R</sup>* mutant, the *wt* profile is superimposed as reference (see **Table S2** and Materials  
1133 and Methods for information about normalization). Top: genomic interval containing the  
1134 *Bithorax-Complex* harbouring the HOX genes *Ubx*, *abd-A* and *Abd-B*; bottom: genomic interval  
1135 containing the *Antennapedia-Complex* with the HOX genes *lab*, *pb*, *Dfd*, *Scr* and *Antp*. Note  
1136 the 3- to 4-fold reduction of H3K27me3 levels across the *Bithorax* and *Antennapedia* loci in  
1137 *H3<sup>K36R</sup>* mutants. Also note that the analyzed tissues (CNS, thoracic imaginal discs and eye-  
1138 antenna discs) represent a mixed population of cells with respect to transcriptionally active and  
1139 repressed states of each HOX gene. For each HOX gene there is a substantially larger  
1140 proportion of cells in which the gene is decorated with H3K27me3 and repressed by Polycomb  
1141 and only a small proportion of cells in which the gene is active and decorated with H3K36me2.  
1142 **(F)** H3K27me3 and H3K36me2 ChIP-seq profiles at the *Bithorax* and *Antennapedia* loci as in  
1143 **(E)** but from *wt* (blue) and *H3<sup>K36A</sup>* mutant (yellow) late-stage embryos with the *wt* profile  
1144 superimposed in the tracks showing the profiles in the *H3<sup>K36A</sup>* mutant. H3K27me3 levels across  
1145 the *Bithorax* and *Antennapedia* loci in *H3<sup>K36A</sup>* mutants are only about 1.5-fold reduced  
1146 compared to *wt*.

1147

1148

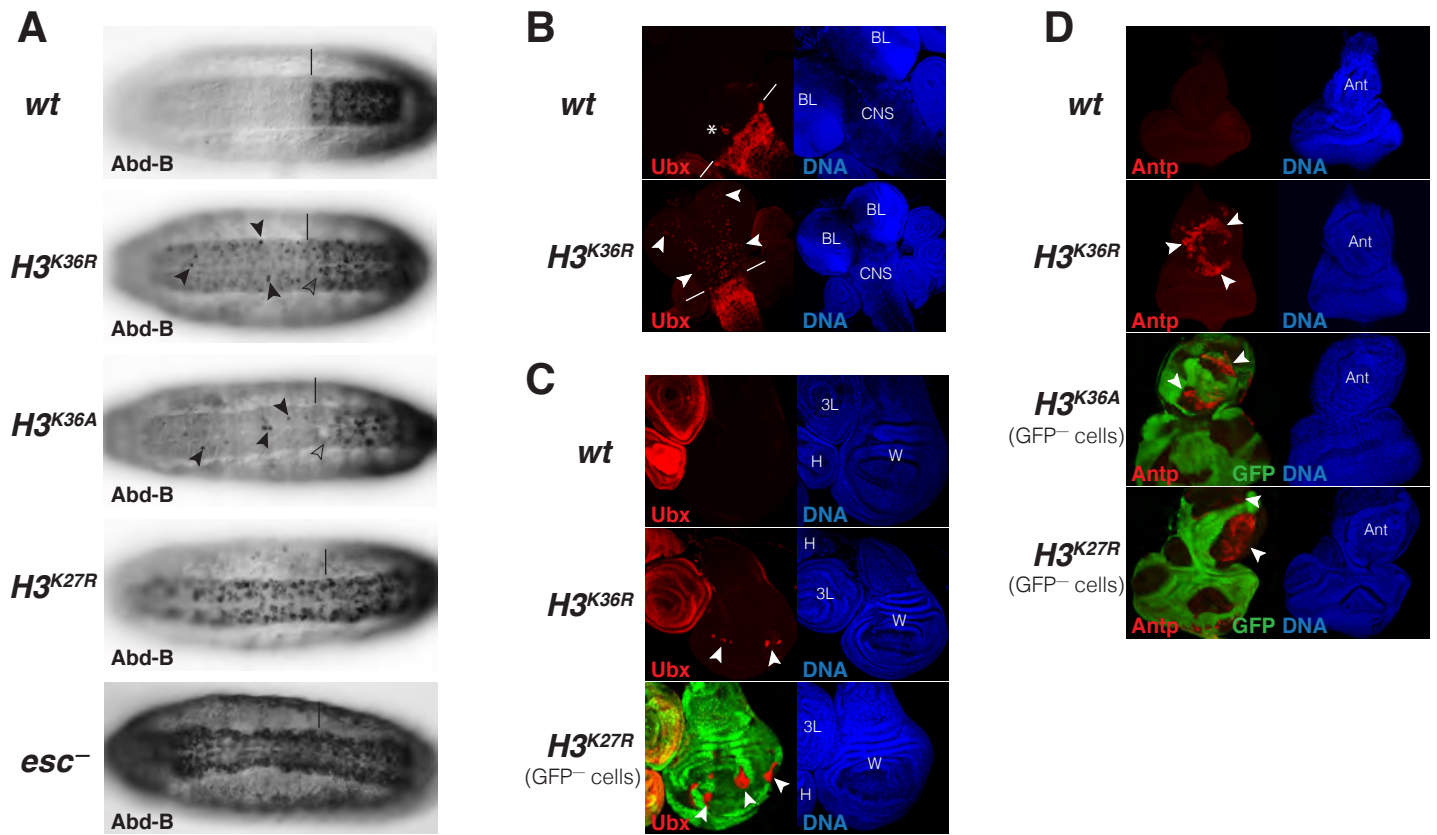

1149 **FIGURE 5**

1150 ***Drosophila* with H3<sup>K36R</sup> or H3<sup>K36A</sup> chromatin show defective Polycomb repression at HOX**  
1151 **genes**

1152 (A) Ventral views of stage 16 wildtype (*wt*), H3<sup>K36A</sup>, H3<sup>K36R</sup>, H3<sup>K27R</sup> or *esc* (*esc*<sup>-</sup>) mutant  
1153 embryos, stained with antibody against Abd-B protein; the *esc* mutant embryo lacked both  
1154 maternal and zygotic expression of *esc* (see Materials and Methods for details of all genotypes).  
1155 The vertical bar marks the anterior boundary of *Abd-B* expression in parasegment (ps) 10 in *wt*  
1156 embryos. Note the stochastic misexpression of Abd-B protein in single cells anterior to ps10  
1157 in H3<sup>K36R</sup> and H3<sup>K36A</sup> mutant embryos (arrowheads). H3<sup>K27R</sup> and *esc* mutant embryos show  
1158 widespread misexpression of Abd-B protein in the head-to-tail pattern characteristic of PcG  
1159 mutants. For reasons that are not well understood, H3<sup>K36A</sup> and H3<sup>K36R</sup> mutants also show partial  
1160 loss of Abd-B expression in cells in ps10 (empty arrowheads).

1161 (B) Larval CNS and brain lobe tissues from wildtype (*wt*) or H3<sup>K36R</sup> mutant third instar larvae,  
1162 stained with antibody against Ubx protein (red) and Hoechst (DNA) to label all nuclei; location  
1163 of CNS and brain lobes (BL) are indicated in the right panel. The white bars mark the anterior  
1164 boundary of *Ubx* expression in ps5 in *wt* embryos, the asterisk marks the *Ubx*-expressing cells  
1165 in the central midline of ps4 that are part of the wild-type *Ubx* pattern. Note the stochastic  
1166 misexpression of *Ubx* protein in many single cells anterior to ps5 in the CNS and in the brain  
1167 lobes (arrowheads).

1168 (C) Imaginal wing (W), haltere (H) and 3<sup>rd</sup> leg (3L) discs from wildtype (*wt*) or H3<sup>K36R</sup> mutant  
1169 third instar larvae and, as reference, discs from a larvae with clones of H3<sup>K27R</sup> mutant cells that  
1170 are marked by the absence of GFP. In all cases discs were stained with antibody against *Ubx*  
1171 protein (red) and Hoechst (DNA) to label all nuclei. In *wt* animals, *Ubx* is expressed in the  
1172 halter and 3<sup>rd</sup> leg disc but not in the wing disc where it is repressed by the PcG machinery. Note  
1173 that in H3<sup>K36R</sup> mutants, *Ubx* is misexpressed in small clusters of cells in the pouch area of the  
1174 wing disc (arrowheads) but remains repressed in the rest of the wing disc. Such misexpression  
1175 was detected in 50% of wing discs (*n* = 28). As reference, a wing discs with H3<sup>K27R</sup> mutant  
1176 clones is shown, where all cells in the clones in the wing pouch (arrowheads) show

1177 misexpression of Ubx and only mutant cells in the notum and hinge show no misexpression  
1178 (empty arrowheads) (cf. (Pengelly et al., 2013)). Also note that in  $H3^{K36R}$  mutants ( $n > 30$   
1179 mutant animals analysed), Ubx expression in haltere and leg discs appears unperturbed  
1180 (asterisks).

1181 **(D)** Eye-antennal imaginal discs from wildtype (*wt*) or  $H3^{K36R}$  mutant larvae and below discs  
1182 from larvae with clones of  $H3^{K36A}$  or  $H3^{K27R}$  mutant cells that are marked by the absence of  
1183 GFP. All animals were stained with antibody against Antp protein (red) and Hoechst (DNA)  
1184 to label all nuclei. Antp is not expressed in the eye-antennal disc of *wt* animals. Note that in  
1185  $H3^{K36R}$  mutant discs, Antp is misexpressed in large clusters of cells (arrowheads) in the antenna  
1186 primordium (Ant). Note that Antp is also misexpressed in  $H3^{K36A}$  or  $H3^{K27R}$  mutant cell clones  
1187 in the antenna primordium (arrowheads) and that in these cases misexpression also only occurs  
1188 in a subset of the mutant cells and not in all clones.

1189

1190

1191

1192

1193

## Supplementary Figure 1

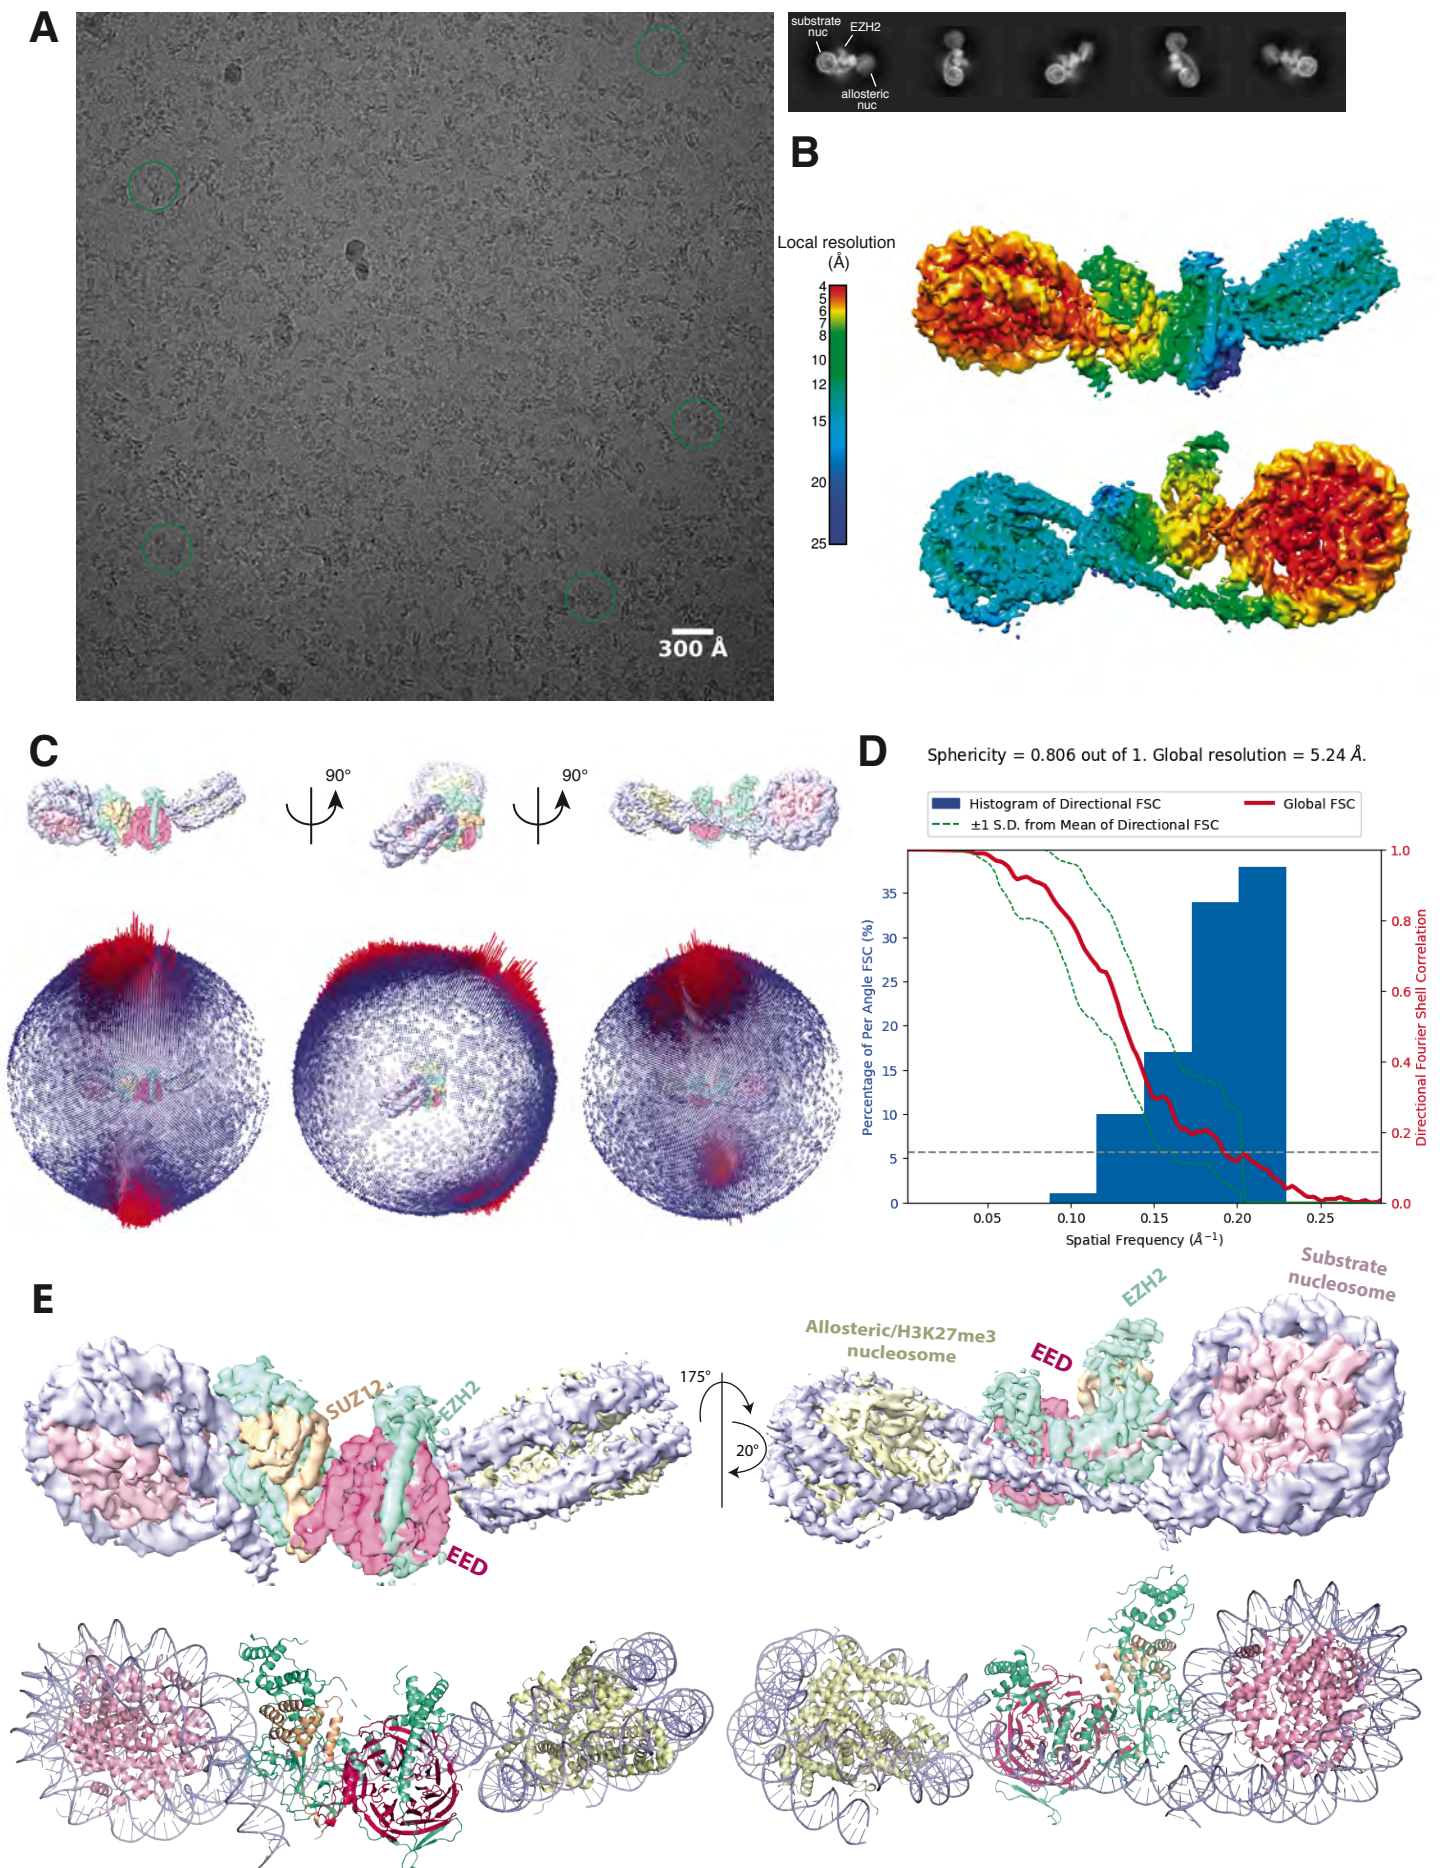



1194 **SUPPLEMENTARY FIGURE 1**

1195

1196 **Initial Cryo-EM analysis of the PHF1-PRC2:di-Nuc complex (related to Fig. 1).**

1197 (A) Representative micrograph of the cryo-EM dataset (left) and reference-free 2D classes  
1198 from particles picked without templates (right) (performed to ensure that no bias was introduced  
1199 through templates picking and references in 3D classification). Circles indicate particles, which  
1200 were picked with templates and directly subjected to 3D analysis (see **fig. S2**).

1201 (B) Local resolution estimation of the 5.2 Å overall PHF1-PRC2:di-Nuc map. The substrate  
1202 nucleosome and the adjacent part of EZH2 are well resolved (colors red to yellow).

1203 (C) Spherical angular distribution of particles included in the final reconstruction of PHF1-  
1204 PRC2:di-Nuc.

1205 (D) Output from the 3DFSC Processing Server (<https://3dfsc.salk.edu/> (Tan et al., 2017))  
1206 showing the Fourier Shell Correlation (FSC) as a function of spatial frequency, generated from  
1207 masked independent half maps of PRC2:diNuc: global FSC (red), directional FSC (blue  
1208 histogram) and deviation from mean (spread, green dotted line). The nominal overall resolution  
1209 of 5.24 Å was estimated according to the gold standard FSC cutoff of 0.143 (grey dotted line)  
1210 (Rosenthal and Henderson, 2003). Sphericity is an indication for anisotropy and amounts to  
1211 0.806 in this data. The minor directional anisotropy of the data can be explained by the slightly  
1212 preferred orientation and missing views as seen in (C).

1213 (E) Top: Refined and postprocessed cryo-EM density map of overall PHF1-PRC2:di-Nuc  
1214 colored according to the subunit organization. Bottom: pseudoatomic model of fitted crystal  
1215 structure of the human PRC2 catalytic lobe (PDB: 5HYN) and a di-Nuc model with 35 bp linker  
1216 DNA (Poepsel et al., 2018), including PDB 1AOI.

1217

## Supplementary Figure 2

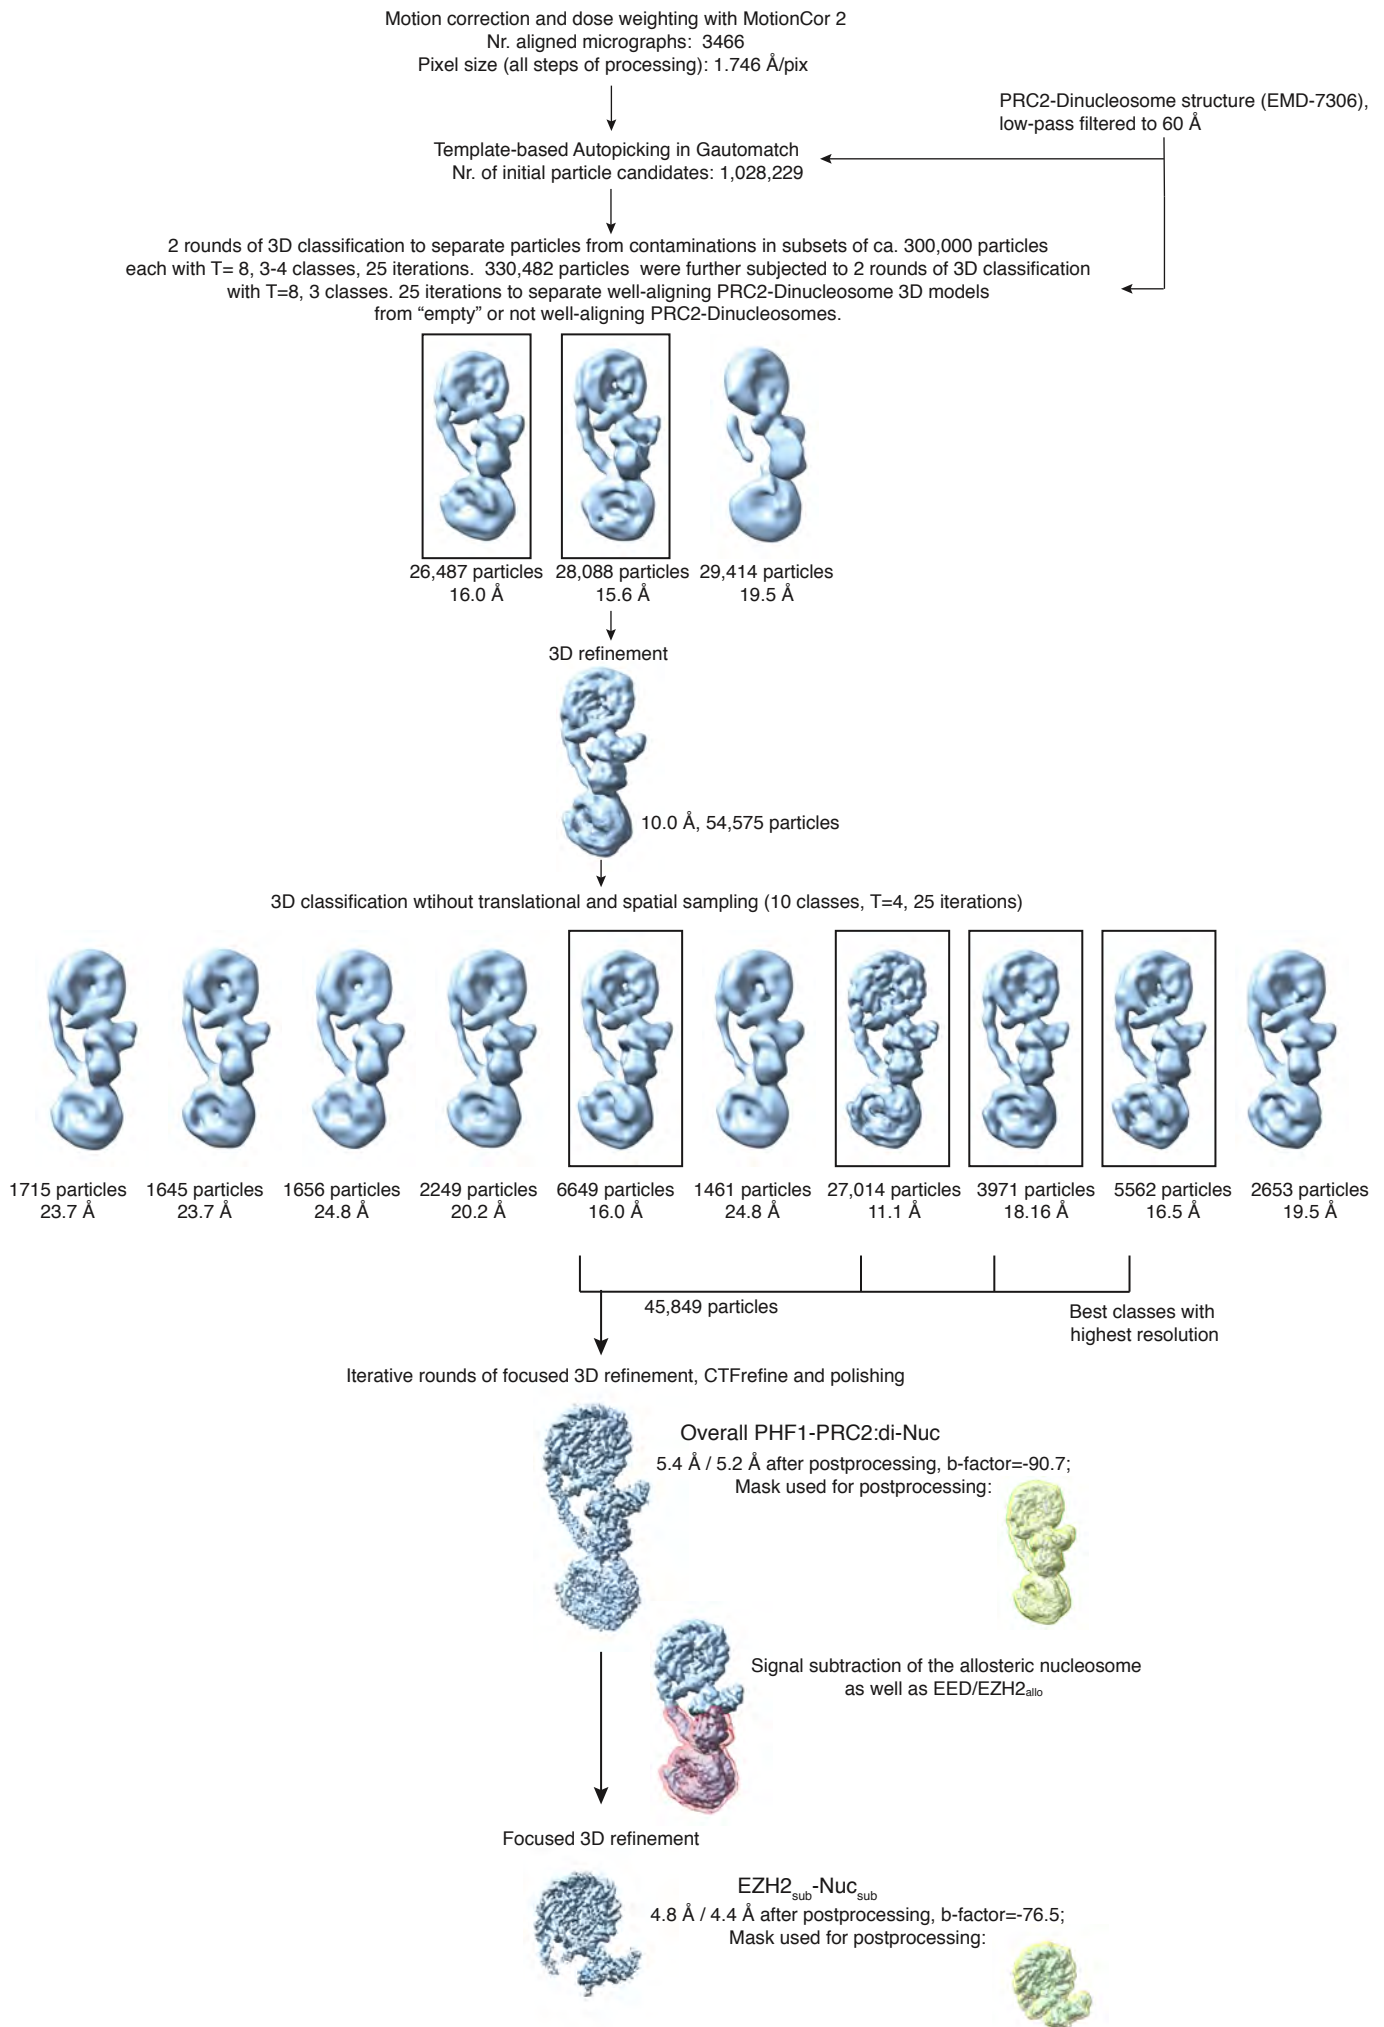

1218 **SUPPLEMENTARY FIGURE 2**

1219

1220 **Overview of the cryo-EM Data-Processing and Particle Sorting Scheme (related to Figure**  
1221 **1).**

1222 Processing and particle sorting scheme, also described in Methods. Squares indicate 3D classes  
1223 (and corresponding particles) chosen for further processing steps based on their nominal global  
1224 resolution values, translational and rotational accuracy and the presence of detailed structural  
1225 information. Two final reconstructions were obtained in this study: Overall PHF1-PRC2:di-  
1226 Nuc, and EZH2<sub>sub</sub>-Nuc<sub>sub</sub> after performing signal subtraction (mask indicated in pink) and  
1227 focused refinement. Masks used for postprocessing are shown in yellow.

1228

# Supplementary Figure 3

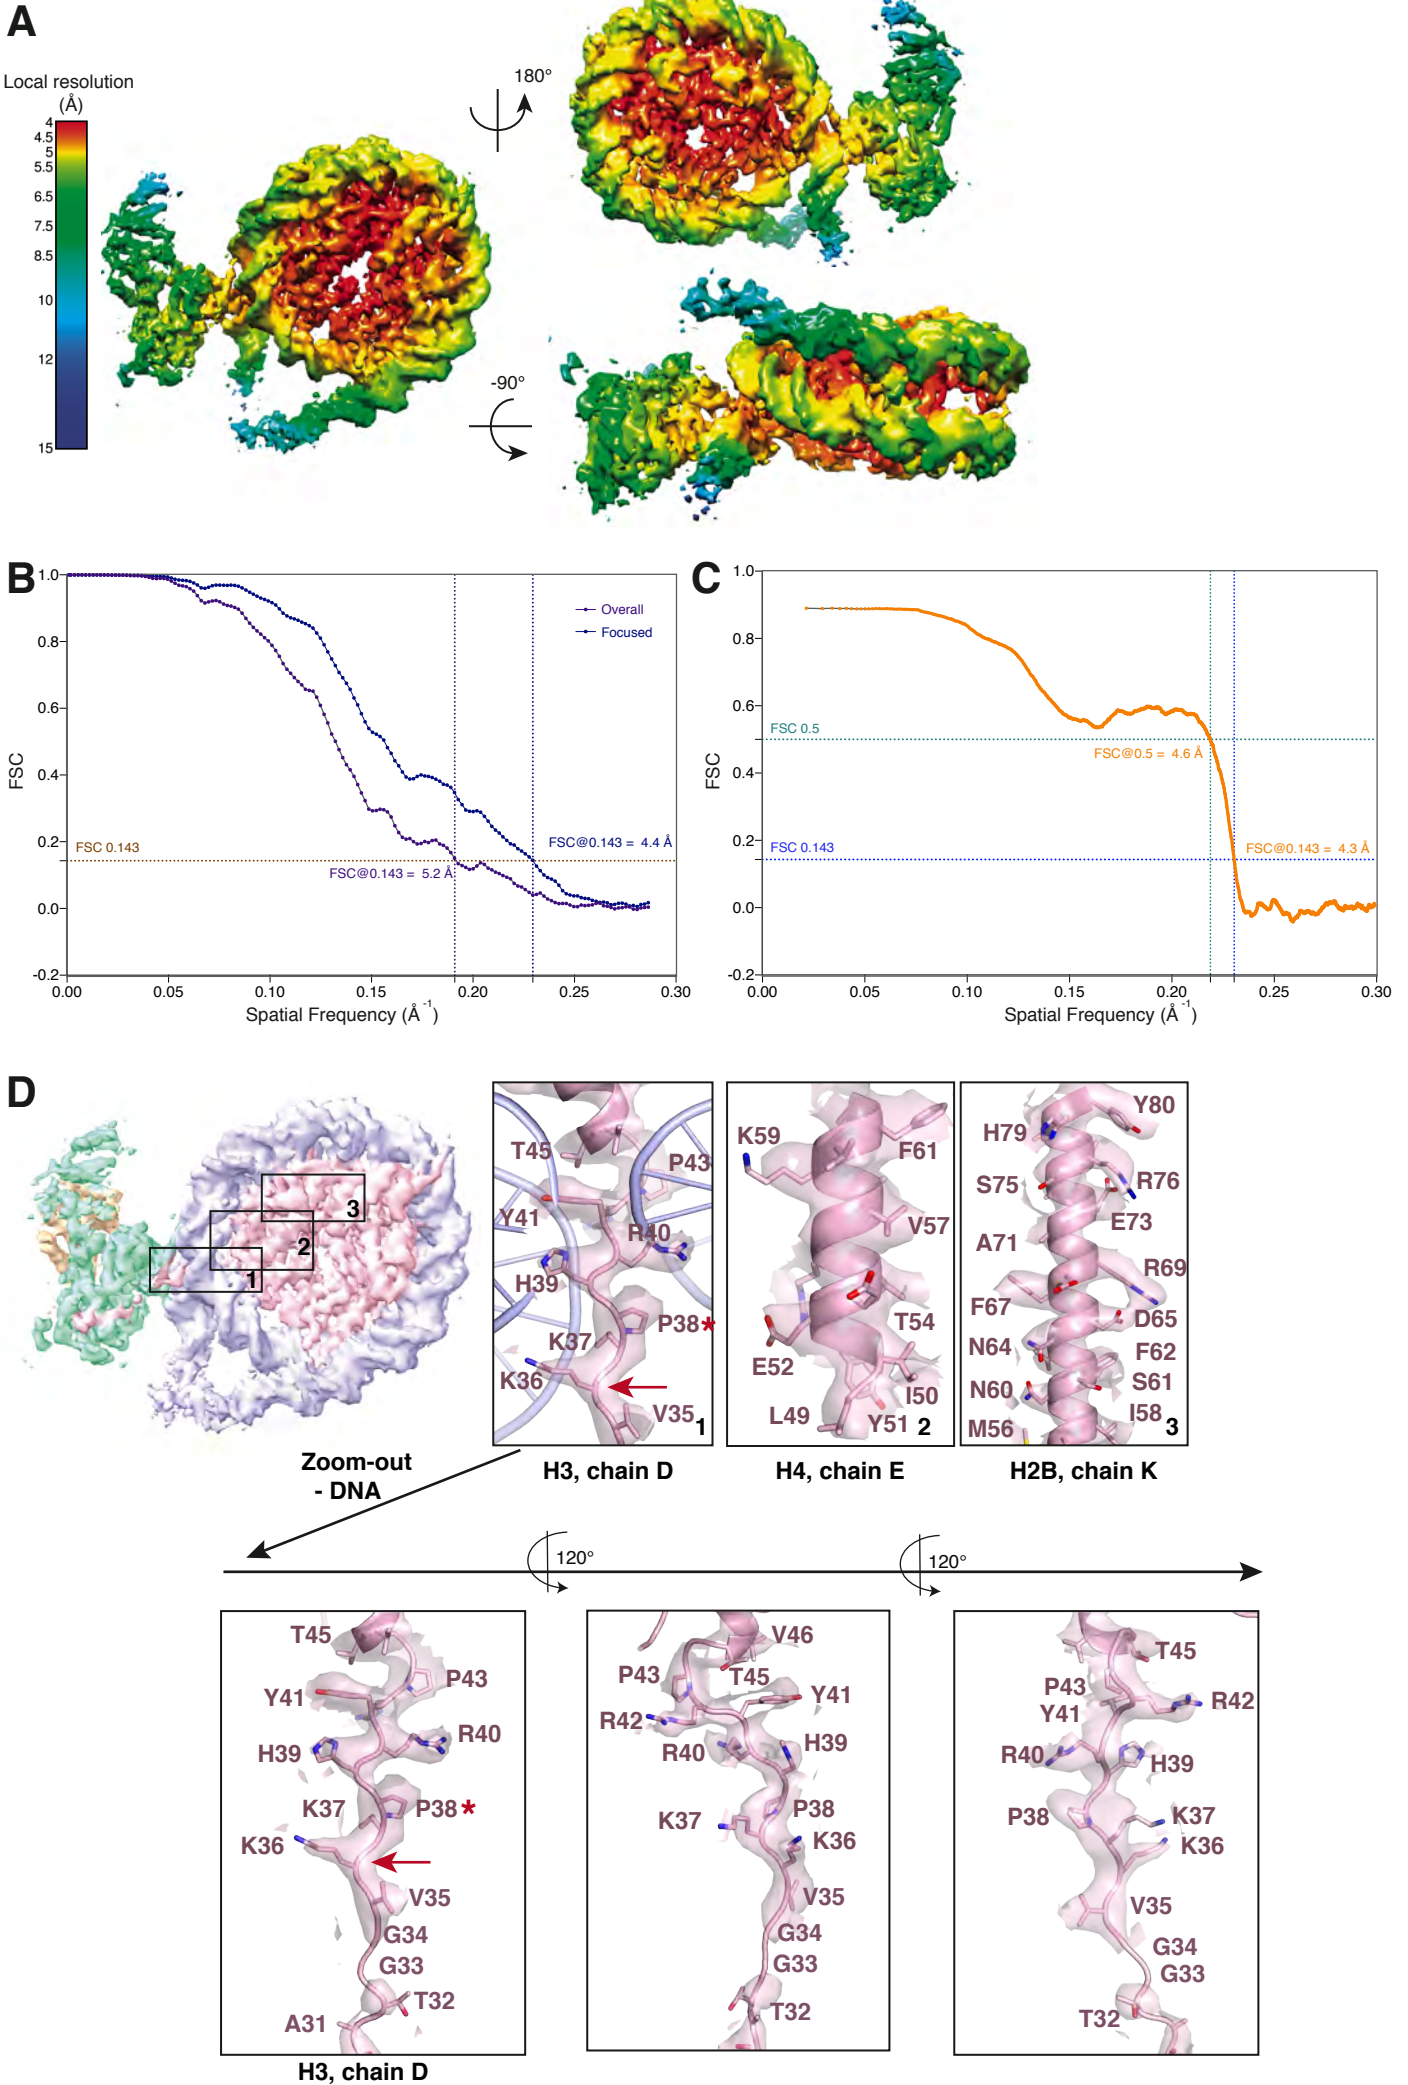

1229 **SUPPLEMENTARY FIGURE 3**

1230

1231 **Cryo-EM analysis of the focused EZH2<sub>sub</sub>-Nuc<sub>sub</sub> map (related to Fig. 1).**

1232 (A) Local resolution estimation of the focused 4.4 Å EZH2<sub>sub</sub>:Nuc<sub>sub</sub> reconstruction. Regions  
1233 in the nucleosome core as well as the adjacent regions including parts of the H3 N-terminus  
1234 close to the exit side of the nucleosome are well resolved (4.0 – 5.5 Å). Regions close to the  
1235 mask, especially the nucleosomal DNA and parts of EZH2, are less well resolved (colors green  
1236 to blue).

1237 (B) Global FSC generated from masked independent half maps of EZH2<sub>sub</sub>-Nuc<sub>sub</sub> (Focused,  
1238 blue line) and the overall PHF1-PRC2:di-Nuc (Overall, violet line) were plotted against spatial  
1239 frequency. The resolution of 4.4 Å for for EZH2<sub>sub</sub>-Nuc<sub>sub</sub> map and 5.2 Å for the overall PHF1-  
1240 PRC2:di-Nuc map were estimated according to the gold standard FSC cutoff of 0.143 (brown  
1241 dotted line) (Rosenthal and Henderson, 2003)

1242 (C) FSC between the atomic model and the masked (applied in Phenix) map of EZH2<sub>sub</sub>-Nuc<sub>sub</sub>  
1243 after real-space refinement (Afonine et al., 2018). Green line represents the cut-off at 0.5 (4.6  
1244 Å) and blue line represents the cut-off at 0.143 (4.3 Å) (see also Table 1) (Henderson et al.,  
1245 2012; Rosenthal and Henderson, 2003; Rosenthal and Rubinstein, 2015).

1246 (D) Selected regions within EZH2<sub>sub</sub>-Nuc<sub>sub</sub> showing side chain density, e.g. K36 (red arrow).  
1247 A red asterisk indicates the last residue of the H3 tail visible in known crystal structures (usually  
1248 P38 or H39). The quality of the map around K36 is shown as a separate zoom-out below and  
1249 in three different views to demonstrate the lack of anisotropy present in the density.

1250

1251

1252

## Supplementary Figure 4

### A. Front view/CXC

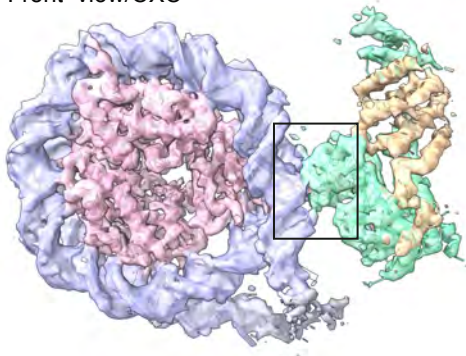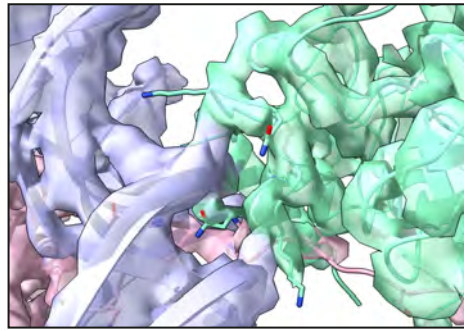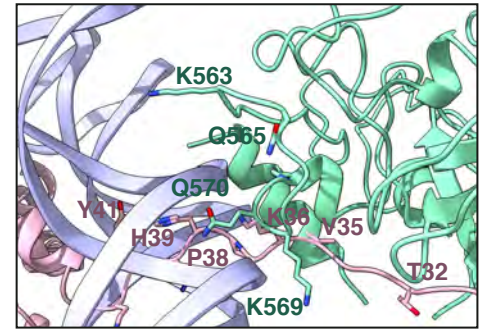

### B. Top view/Bridge Helix

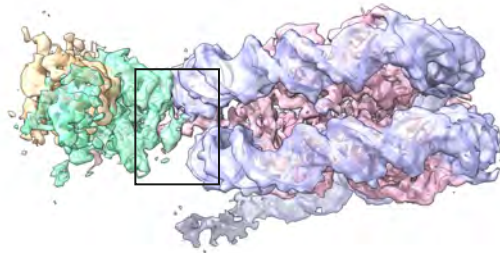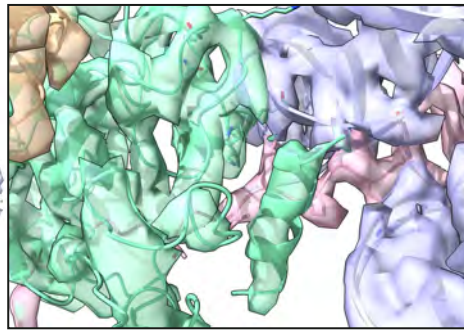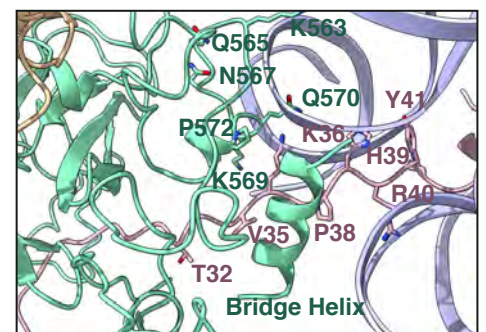

### C. Bottom view/K36 position

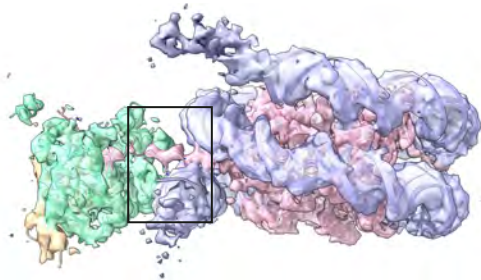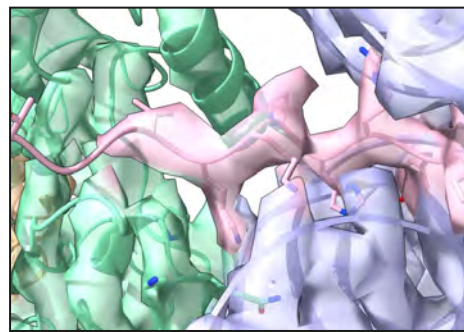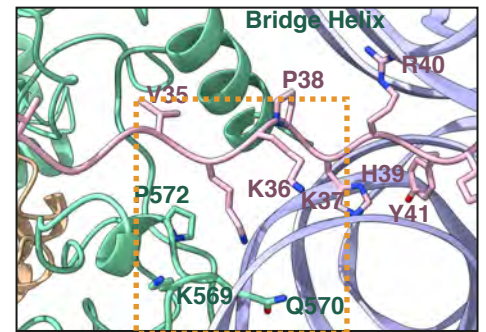

### D. Back view/Bridge helix and K36 position

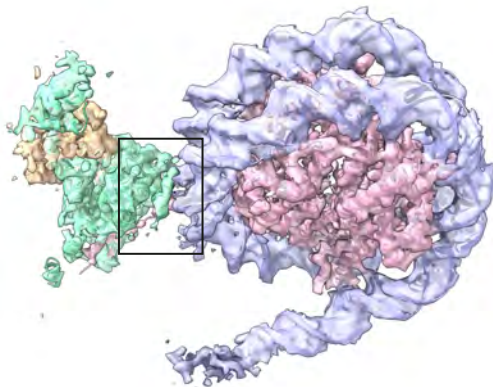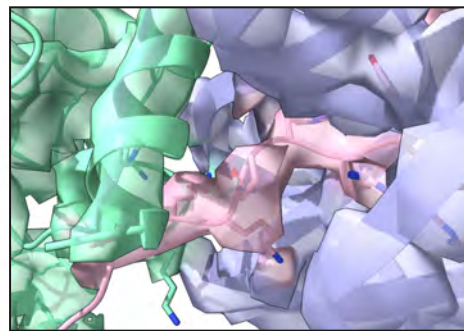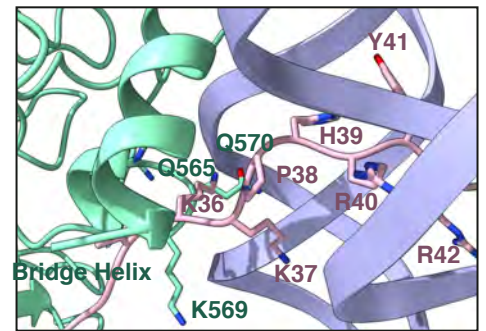

### E.

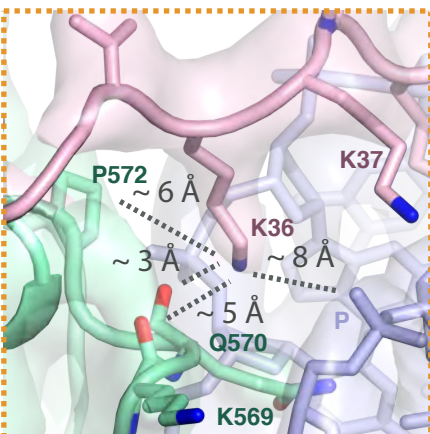

~180°

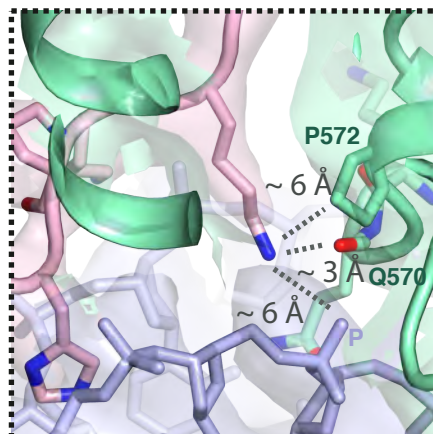

### F.

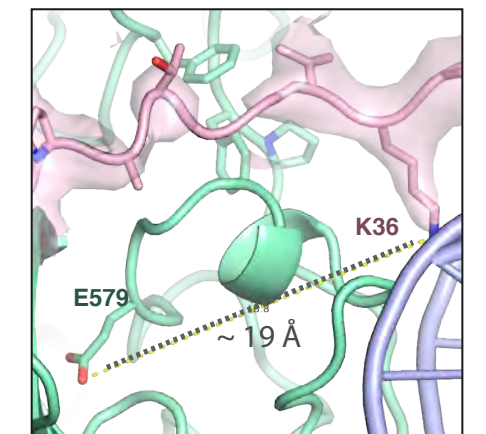

H3 tail/E579 pocket

1253 **SUPPLEMENTARY FIGURE 4**

1254

1255 **The improved map of the interaction between EZH2 and the substrate nucleosome**  
1256 **after focused refinement reveals location of H3K36 and it's environment (related to Fig.**  
1257 **1).**

1258 (A) The front view of EZH2<sub>sub</sub>-Nuc<sub>sub</sub> cryo-EM density and model shows details of the  
1259 EZH2<sub>CXC</sub> interaction with nucleosomal DNA.

1260 (B) The top view of EZH2<sub>sub</sub>-Nuc<sub>sub</sub> cryo-EM shows a tubular density into which based on  
1261 recent findings of (Kasinath et al., 2020) a helix was built. The bridge helix, which based on  
1262 this study is likely constituted of the EZH2 residues 497-511, is located above V35 of the H3  
1263 tail. As can be seen when observing the density-modified map (Terwilliger et al., 2019) of  
1264 EZH2<sub>sub</sub>-Nuc<sub>sub</sub> at lower threshold, it presumably engages in interactions with the nucleosomal  
1265 DNA, the H3 tail and EZH2, as described in greater detail in (Kasinath et al., 2020).

1266 (C) The bottom view of EZH2<sub>sub</sub>-Nuc<sub>sub</sub> cryo-EM density and model shows details of the  
1267 vicinity of K36 with the corresponding density for the H3 tail, EZH2 and nucleosomal DNA.

1268 The orange square indicates the region shown as a zoom-in in (E).

1269 (D) The back view of EZH2<sub>sub</sub>-Nuc<sub>sub</sub> cryo-EM density and model shows details of the location  
1270 of K36 and the bridge helix.

1271 (E) Zoom-in views of H3K36 and it's chemical environment. Approximate distances of the  
1272 epsilon-amino group of H3K36 to the nearest residues are indicated with a dotted grey line.

1273 (F) Location of the Glu-579 pocket (Jani et al., 2019) in the EZH2<sub>sub</sub>:Nuc<sub>sub</sub> reconstruction and  
1274 it's distance to H3K36 (app. 19 Å). The described mechanism by Jani et al (Jani et al., 2019)  
1275 involving recognition of H3K36 by Glu-579 is incompatible with the presented structural data  
1276 as the location differs significantly and major rearrangements as the relocation of the helix-loop  
1277 region between residues 564-576 would be necessary to avoid the given steric and geometric  
1278 hindrance and allow for potential interaction.

1279

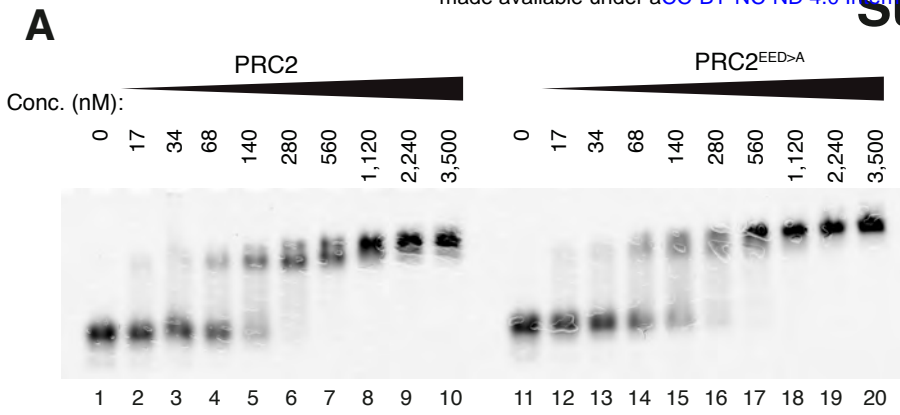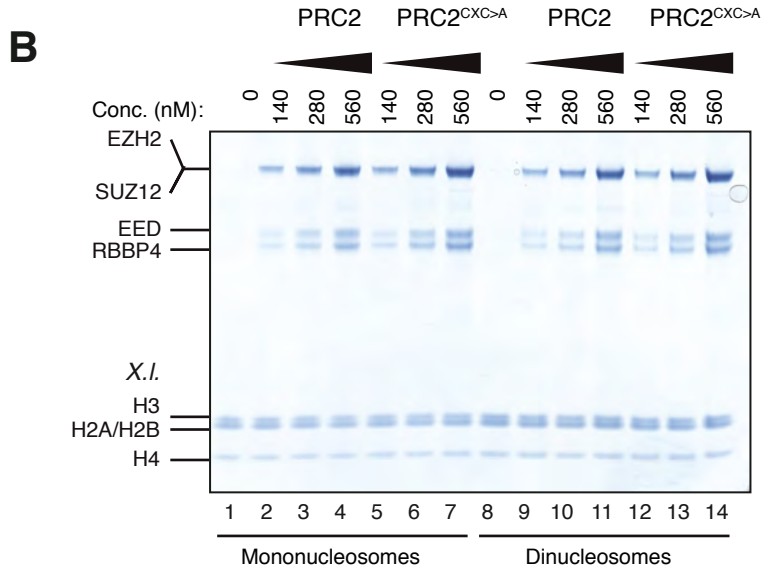



1280 **SUPPLEMENTARY FIGURE 5**

1281

1282 **The EZH2<sub>CXC</sub>-DNA interaction interface is critical for H3K27 methylation on**  
1283 **nucleosomes (related to Fig. 2).**

1284 **(A)** Binding reactions with indicated concentrations of PRC2 (lanes 1-10) or PRC2<sup>EED>A</sup> (lanes  
1285 11-20) and 45 nM 6-carboxyfluorescein-labeled mononucleosomes, analyzed by EMSA on  
1286 1.2% agarose gels.

1287 **(B)** Coomassie-stained 4-12% SDS-PAGE of the HMTase reactions shown in **Fig. 2C**. *Xenopus*  
1288 *laevis* (*X.l.*) nucleosomes were used for these experiments. The short 5-kDa PHF<sub>C</sub> fragment is  
1289 not visible on this gel.

1290

1291

1292

# Supplementary Figure 6

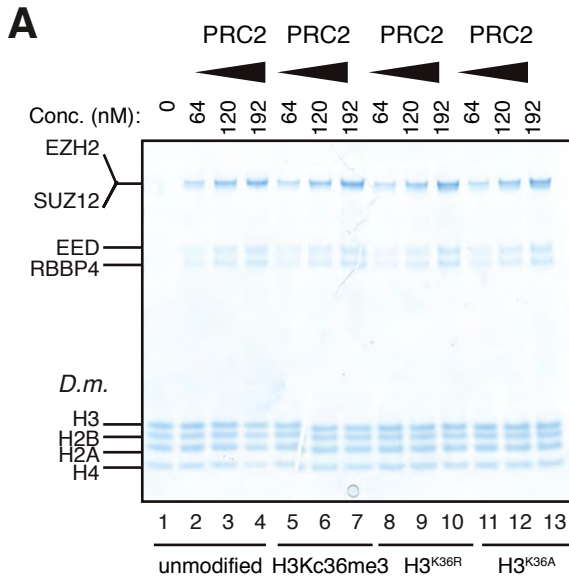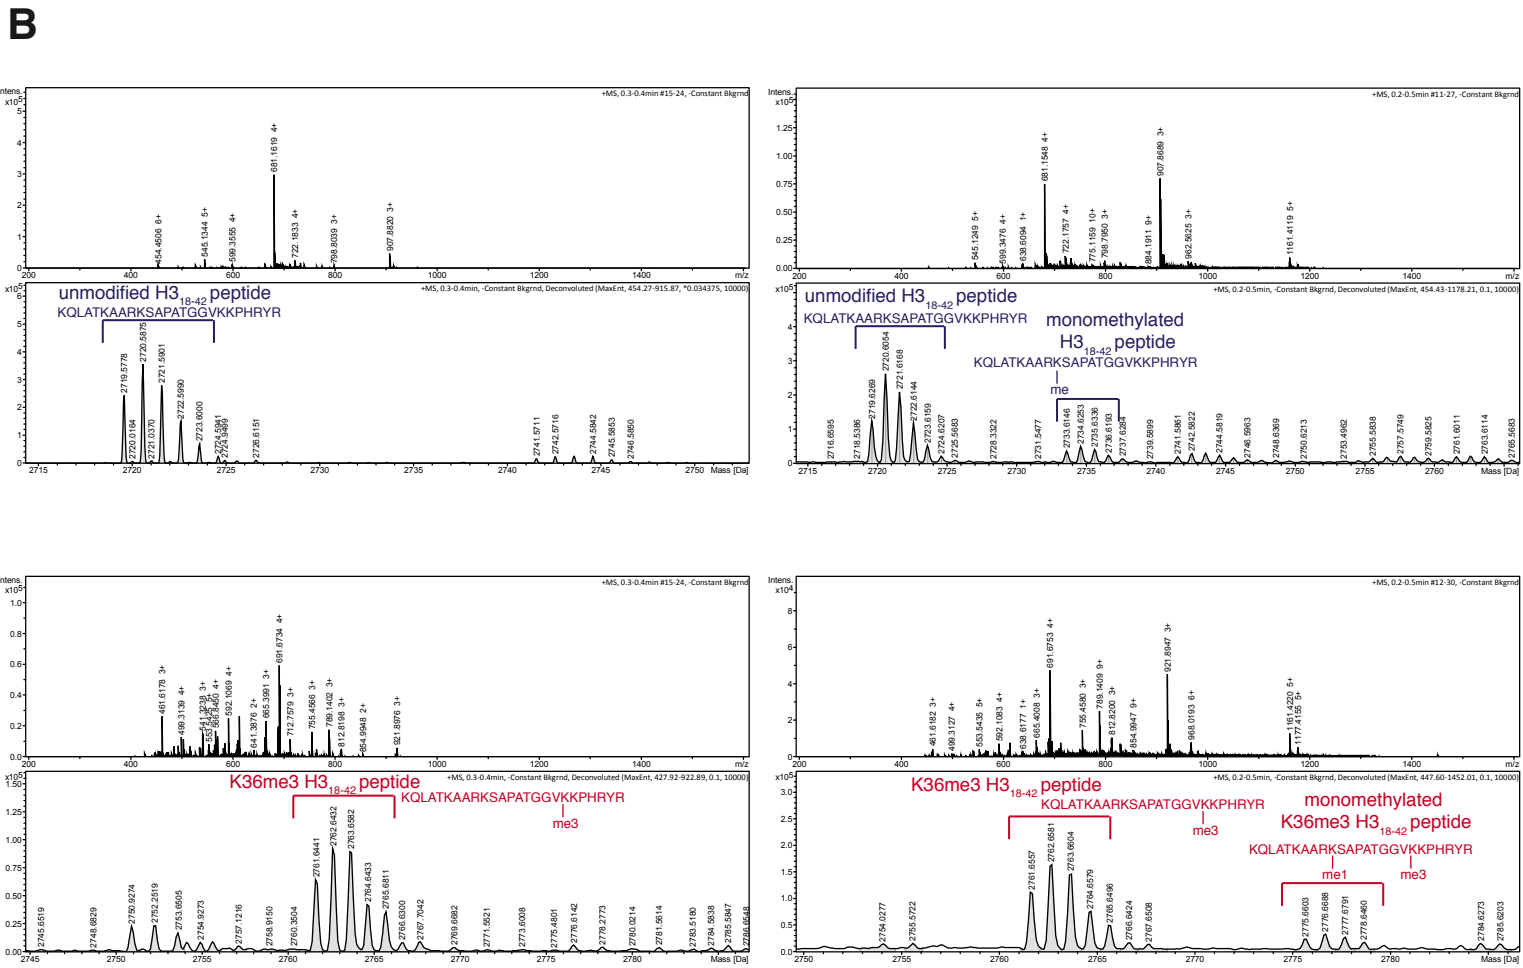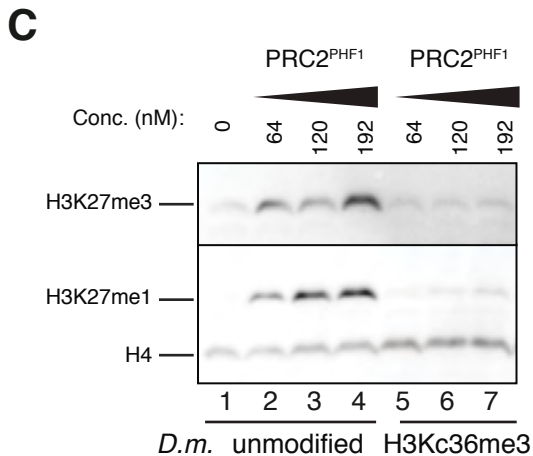

1293 **SUPPLEMENTARY FIGURE 6**

1294

1295 **Accommodation of unmodified H3K36 in the EZH2<sub>CXC</sub>-DNA interaction interface is**  
1296 **essential for H3K27 methylation on nucleosomes and PHF1-PRC2 (related to Fig. 3).**

1297 (A) Coomassie-stained 4-12% SDS-PAGE of the HMTase reactions shown in Fig. 3C.  
1298 *Drosophila melanogaster* (*D.m.*) nucleosomes were used for these experiments. The short 5-  
1299 kDa PHF<sub>C</sub> fragment is not visible on this gel.

1300 (B) Full ESI MS spectra (upper part) and full deconvoluted MS spectra (lower part) shown for  
1301 input peptides without PRC2 as a control (left) and with PRC2 (right) to ensure no overlapping  
1302 between possible adduct peaks and monomethylation peaks.

1303 (C) Western Blot (WB) analysis of HMTase reactions with full-length PHF1-PRC2 on  
1304 unmodified (lanes 1-4) or H3Kc36me3 (lanes 5-7) mononucleosomes (446 nM).

1305

1306

1307



1308 **SUPPLEMENTARY FIGURE 7**

1309

1310 ***Drosophila* with  $H3^{K36R}$  or  $H3^{K36A}$  mutant chromatin arrest development at different**  
1311 **stages**

1312 (A) Ventral views of cuticles from wildtype (*wt*),  $H3^{K36R}$ , or  $H3^{K36A}$  mutant embryos. Note that  
1313 the cuticle pattern of the mutant animals is indistinguishable from that of the *wt* embryo.

1314 Below: for each genotype, the fraction of embryos that developed into larvae, pupae, pharate  
1315 adults or viable adults is listed. The fraction was determined by monitoring the development  
1316 of collected hatched 1<sup>st</sup> instar larvae (*wt*:  $n=300$ ,  $H3^{K36R}$ :  $n=2000$ ) or unhatched embryos  
1317 ( $H3^{K36A}$ :  $n=200$ ). The GFP marker on the Balancer chromosomes was used for identifying  
1318  $H3^{K36R}$  and or  $H3^{K36A}$  mutants.

1319 (B) Dorsal views of the posterior portion of the thorax and of the abdomen. From 2000 hatched  
1320  $H3^{K36R}$  mutant 1<sup>st</sup> instar larvae, a total of 18 pharate adults was recovered. Most  $H3^{K36R}$  mutant  
1321 pharate adults showed a relatively normal overall body patterning apart from the homeotic  
1322 transformations illustrated below.

1323 (C) Frontal view of adult heads illustrating the antenna-to-leg transformation in  $H3^{K36R}$  mutant  
1324 pharate adults. The antenna-to-leg transformation in  $H3^{K36R}$  mutant animals ranged from mild  
1325 (arrows) to more extensive transformations with formation of leg-like structures such as in this  
1326 extreme case (arrowheads).

1327 (D) The sex comb in males is normally only present on the protoracic (L1) legs (arrowheads).  
1328 Among the  $H3^{K36R}$  mutant pharate adult males recovered ( $n=13$ ), five showed one or several  
1329 extra sex comb teeth (arrow) on the meso- (L2) or metathoracic (L3) legs. Extra sex comb teeth  
1330 in adults are a hallmark phenotype of Polycomb mutants.

1331

1332

## Supplementary Figure 8

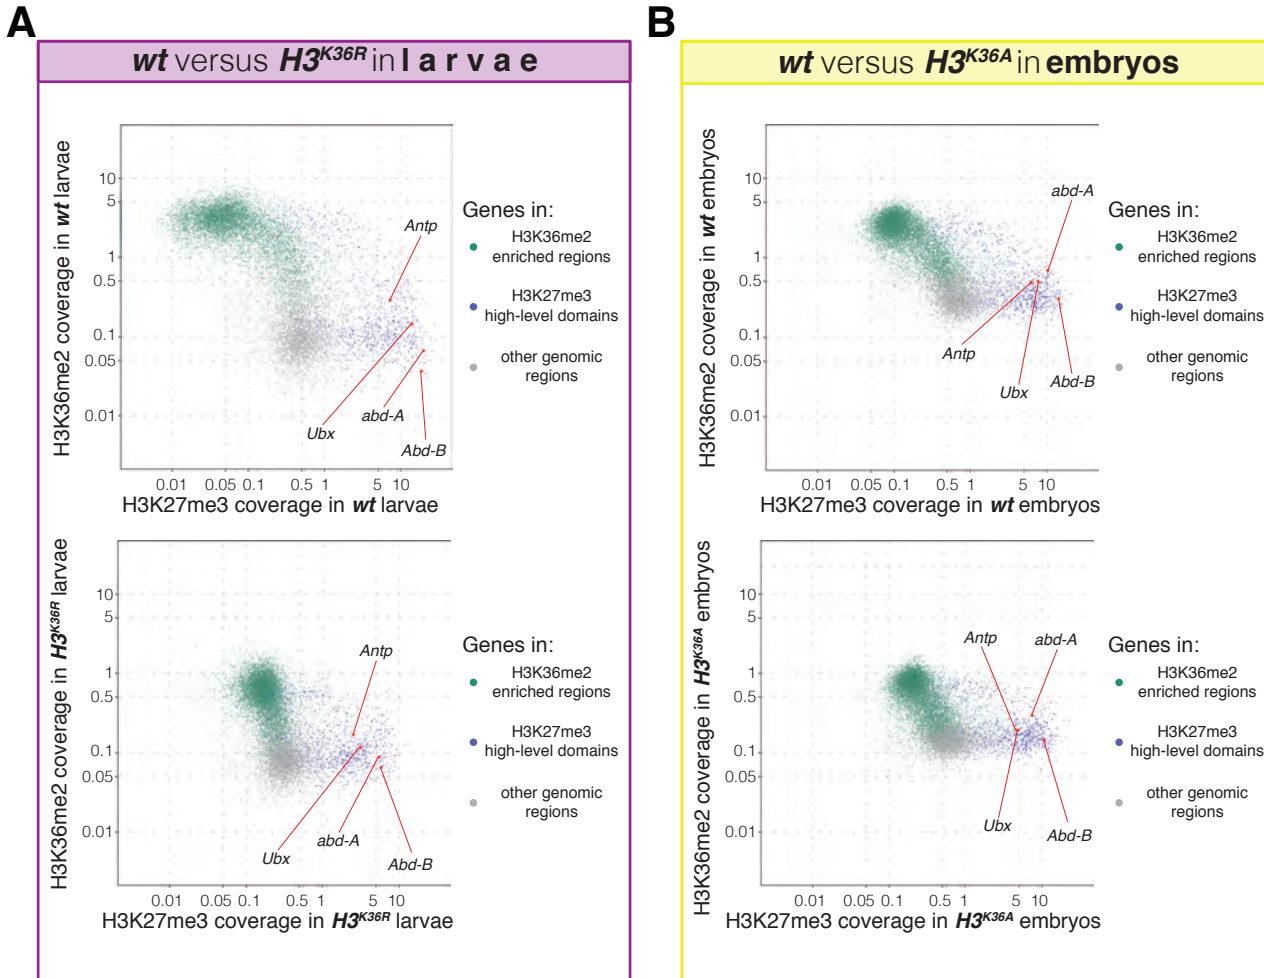

1333 **SUPPLEMENTARY FIGURE 8**

1334

1335 ***H3<sup>K36R</sup>* and *H3<sup>K36A</sup>* mutants show altered H3K36me2 and H3K27me3 profiles (related to**  
1336 **Fig. 4)**

1337 (A) Top, scatter plots showing H3K36me2 coverage in relation to H3K27me3 coverage in *wt*  
1338 larvae. Green dots represent 9200 gene bodies overlapping with genomic intervals showing  
1339 H3K36me2 enrichment, blue dots represent 1030 gene bodies overlapping with genomic  
1340 intervals defined as high-level H3K27me3 domains (Bonnet et al., 2019), and grey dots  
1341 represent 6300 gene bodies showing no enrichment for either methylation mark in larvae (see  
1342 Materials and Methods). Bottom, scatter plot showing the H3K36me2 read coverage in relation  
1343 to H3K27me3 read coverage in *H3<sup>K36R</sup>* mutant larvae.

1344 (B) As in (A) but showing H3K36me2 coverage in relation to H3K27me3 coverage in *wt*  
1345 embryos (top) and in *H3<sup>K36A</sup>* mutant embryos (bottom). Green dots represent 10800 gene bodies  
1346 overlapping with genomic intervals showing H3K36me2 enrichment, blue dots represent 1030  
1347 gene bodies overlapping with genomic intervals defined as high-level H3K27me3 domains  
1348 (Bonnet et al., 2019), and grey dots represent 5400 gene bodies showing no enrichment for  
1349 either methylation mark in embryos (see Materials and Methods).

1350

1351

1352

1353

1354 **Table S1**  
 1355  
 1356 **Cryo electron microscopy data collection summary, processing statistics and model**

| <b>Cryo electron microscopy data collection (applicable to Overall PHF1-PRC2:diNuc and EZH2<sub>sub</sub>-Nuc<sub>sub</sub> maps)</b> |                               |                                         |
|---------------------------------------------------------------------------------------------------------------------------------------|-------------------------------|-----------------------------------------|
| Microscope                                                                                                                            | FEI Titan Krios GII           |                                         |
| Voltage (kV)                                                                                                                          | 300                           |                                         |
| Camera                                                                                                                                | Gatan K2-Summit               |                                         |
| Energy Filter                                                                                                                         | Gatan Quantum-LS (GIF)        |                                         |
| Pixel size (Å/pix) (calibrated)                                                                                                       | 1.75                          |                                         |
| Nominal magnification (x)                                                                                                             | 81000                         |                                         |
| Preset target global defocus range (µm)                                                                                               | 0.5 - 3.5                     |                                         |
| Total electron exposure (fluence, e <sup>-</sup> /Å <sup>2</sup> )                                                                    | 52,96                         |                                         |
| Exposure rate (flux) (e <sup>-</sup> / Å <sup>2</sup> /s)                                                                             | 3,47                          |                                         |
| Nr. of frames collected per micrograph                                                                                                | 60                            |                                         |
| Energy filter slit width (eV)                                                                                                         | 20                            |                                         |
| Automation Software                                                                                                                   | SerialEM                      |                                         |
| <b>3D reconstruction (applicable to Overall PHF1-PRC2:diNuc and EZH2<sub>sub</sub>-Nuc<sub>sub</sub> maps)</b>                        |                               |                                         |
| Number of movies                                                                                                                      | 3466                          |                                         |
| Initially selected particle candidates                                                                                                | 1,028,229                     |                                         |
| Final number of particles                                                                                                             | 45,849                        |                                         |
|                                                                                                                                       | Overall PHF1-PRC2:diNuc       | EZH2 <sub>sub</sub> -Nuc <sub>sub</sub> |
| Resolution <sub>FSC independent halfmaps (0.143) masked</sub> (Å) <sup>a</sup>                                                        | 5.24                          | 4.36                                    |
| Local resolution range (Å)                                                                                                            | 4.01 - 24.97                  | 4.01 – 15.00                            |
| Sharpening B-factor (Å <sup>2</sup> )                                                                                                 | -90.7                         | -76.5                                   |
| <b>Refinement</b>                                                                                                                     |                               |                                         |
| <b>EZH2<sub>sub</sub>-Nuc<sub>sub</sub></b>                                                                                           |                               |                                         |
| No. atoms                                                                                                                             | 28866 (Hydrogens: 13086)      |                                         |
| Residues                                                                                                                              | Protein: 1171 Nucleotide: 312 |                                         |
| Ligands                                                                                                                               | ZN: 8                         |                                         |
| CC <sub>mask</sub> , CC <sub>box</sub> , CC <sub>peaks</sub> , CC <sub>volume</sub> <sup>b</sup>                                      | 0.75, 0.83, 0.66, 0.74        |                                         |
| Mean CC for ligands                                                                                                                   | 0.72                          |                                         |
| Resolution <sub>FSC masked map vs. model (0/0.143/0.5)</sub> (Å) <sup>b</sup>                                                         | 4.3/4.3/4.6                   |                                         |
| R.m.s. deviations                                                                                                                     |                               |                                         |
| Bond lengths (Å)                                                                                                                      | 0.004                         |                                         |
| Bond angles (°)                                                                                                                       | 0.642                         |                                         |
| Ramachandran favored (%)                                                                                                              | 97.51                         |                                         |
| Ramachandran gen. allowed (%)                                                                                                         | 2.32                          |                                         |
| Ramachandran disallowed (%)                                                                                                           | 0.17                          |                                         |



|                        |  |                      |
|------------------------|--|----------------------|
| MolProbity score       |  | 1.53                 |
| Clash score            |  | 7.97                 |
| ADP (B factors)        |  |                      |
| Iso/Aniso (#)          |  | 15925/0              |
| Min/max/mean           |  |                      |
| Protein                |  | 65.89/264.21/121.82  |
| Nucleotide             |  | 97.31/221.62/132.65  |
| Ligand                 |  | 151.54/251.77/201.51 |
| Rotamer outliers (%)   |  | 0.00                 |
| C $\beta$ outliers (%) |  | 0.00                 |
| CaBLAM outliers (%)    |  | 1.59                 |
|                        |  |                      |
|                        |  |                      |

<sup>a</sup>according to the Fourier Shell Correlation (FSC) cut-off criterion of 0.143 defined in (Rosenthal and Henderson, 2003)

<sup>b</sup>according to the map-vs.-model Correlation Coefficient definitions in (Afonine et al., 2018a)

1357  
1358  
1359

1360 **Table S2.**  
1361  
1362 **Number of aligned reads to the *D. melanogaster* and *D. pseudoobscura* genomes from**  
1363 **ChIP and input datasets and normalization process (related to Figure 4 and**  
1364 **Supplementary Figure 8).**  
1365  
1366

1367 **Movie S1**

1368

1369 **Cryo-EM structure of the PHF1-PRC2:di-Nuc complex (related to Figure 1).**

1370
